# Supplementary material
Source: Research Square preprint supplement (doi:10.21203/rs.3.rs-8833509/v1)
Supplement: Supplementary file 1 [file 15f8c4dc160640a837deb1a3.xlsx]

## Sheet: SEC summary for EAS
Bio-electrochemical systems (BESs)
Index		No.	Title	Special condition		Wastewater type	TAN(mg/L)	Current Dsity(A/m2) (constant or peak)	Constant voltage(V)	Time(h)	Temperature(℃)	Ammonia removal efficiency	Ammonia removal SEC(kwh/kg N)	Ammonia recovery efficiency	Ammonia recovery SEC(kwh/kg N)	Ammonia recovery rate (g N/m2/d)	Stripping unit type
1	MEC	1	A tartrate-EDTA-Fe complex mediates electron transfer and enhances ammonia recovery in a bioelectrochemical-stripping system	Tartrate-EDTA-Fe-amended catholyte	Electron mediator (EM) into the catholyte, only considered the energy consumption caused by catholyte recirculation	Synthetic	3670	0.596022	/	/	/	/	/	/	0.045	4.19048	Stripping column+Acid trap tank
2	MEC			Tartrate-EDTA-Fe-amended catholyte		Synthetic	3670	0.8217	/	/	/	/	/	/	0.0775	4.58667
3	MEC			Tartrate-EDTA-Fe-amended catholyte		Synthetic	3670	1.15732	/	/	/	/	/	/	0.302222	6.75048
4	MEC			Tartrate-EDTA-Fe-amended catholyte		Synthetic	3670	1.20072	/	/	/	0.669	/	0.908	0.592222	6.87238
5	MEC			NaCl catholyte-1A	No Electron mediator (EM) into the catholyte	Synthetic			/	/	/	0.185	/	0.85	2.39111	/
6	MEC	2	Ammonia recovery from urine in a scaled-up Microbial Electrolysis Cell	without taking into account the energy required for pumping	/	Real urine	680	/	0.5	63	/	/	/		1.69606		Membrane contractor
7	MEC				/	Real urine	1360	/	0.5	14	/	0.925	/	0.31	1.38086	/
8	MEC				/	Real urine	1700	/	0.5	27	/	/	/	/	1.49719	/
9	MEC				/	Real urine	3400	/	0.5	27	/	/	/	/	1.5122	/
10	MEC				/	Real urine	3400	/	0.6	27	/	/	/	/	0.964353	/
11	MEC				/	Real urine	3400	/	0.7	27	/	/	/	0.26	1.05441	/
12	MEC	3	Ammonia recovery from waste streams: Energy efficiency and performance of microbial electrochemical system and electrochemical system	/	MEC	Synthetic	1000	/	0.4	/	/	0.465922	/	0.417318	2e-14	/	Stripping column+Acid trap tank
13	EC-IEM				MEC	Synthetic	1000	/	1.2	/	/	0.521229	/	0.491061	0.00015	/
14	EC-IEM				EC	Synthetic	1000	/	0.4	/	/	0.426549	/	0.385841	1e-05	/
15	MEC				EC	Synthetic	1000	/	1.2	/	/	0.523894	/	0.486726	0.0002	/
16	MEC	4	Ammonium recovery from reject water combined with hydrogen production in a bioelectrochemical reactor	considering only the electrical energy input to the bioelectrochemical reactor	/	synthetic	1000	7.04225	0.94	20				0.52	5		Stripping tank+Acid trap tank
17	MEC				/	synthetic	1000	7.04225	0.86	20	/	/	/	0.4	4.8	/
18	MEC				/	synthetic	1000	14.0845	1.21	20	/	/	/	0.74	8.6	/
19	MEC				/	synthetic	1000	14.0845	1.22	20	/	/	/	0.86	7.2	/
20	MEC				/	synthetic	1000	21.1268	1.54	20	/	/	/	0.82	14.5	/
21	MEC				/	synthetic	1000	21.1268	1.48	20	/	/	/	0.94	12.3	/
22	MEC				/	Real reject water	1000	7.04225	0.89	20	/	/	/	0.57	3.8	/
23	MEC				/	Real reject water	1000	14.0845	1.26	20	/	/	/	0.65	8.6	/
24	MEC				/	Real reject water	1000	21.1268	1.87	20	/	/	/	0.74	15.9	/
25	MEC				/	Real reject water	1000	21.1268	1.58	20	/	/	/	0.73	13.6	/
26	MEC				/	Real reject water	1000	28.169	1.92	20	/	/	/	0.79	20.5	/
27	MEC	5	Bioelectrochemical extraction of ammonium from low-strength wastewater with concomitant generation of high-purity hydrogen	2M NaOH added to anolyte	Only recover ammonia	Synthetic	200	0.97	0.87	227	25	/	/	0.374	27.8	0.02	Acid trap tank
28	MEC			/	Only recover ammonia		200	6.21	2.06	227	25	/	/	0.509	52.4	0.13
29	MEC				Only recover ammonia		200	14.6	3.04	227	25	/	/	0.489	171	0.14
30	MEC				Only recover ammonia		200	28.9	3.37	227	25	/	/	0.691	266	0.2
31	MEC	6	Development and optimization of a bioelectrochemical system for ammonium recovery from wastewater as fertilizer	cathode surface aeration was not considered		Synthetic+Real	1000	2.5			30	0.751	1.6	0.453	2.2	9.6	Acid trap tank
32	MEC			cathode surface aeration was considered			1000	2.5			30	0.751		0.453	10.8	9.6
33	MEC	7	Electrochemical and bioelectrochemical ammonium recovery from N-loaded streams using a hydrophobic membrane	/	Biotic systems	Synthetic	200	5	/	24	/	/	/	/	< 4	/	Membrane contractor
34	EC-IEM				Abiotic setups		200	5	/	24	/	/	/	/	26	/
35	EC-IEM				Abiotic setups		200	7.5	/	24	/	/	/	/	16	/
36	MEC	8	Low-energy ammonium recovery by a combined bio-electrochemical and electrochemical system	/	/	Synthetic	1100	0.8	/	/	/	0.92	1.83333	/	2.55556	/	Membrane contractor
37	MEC				/		5500	4	/	/	/	0.998	2.55556	/	/	/
38	MEC				/		5500	18	/	/	/	0.9	3.33333	/	/	/
39	MEC	9	Nickel-Based Membrane Electrodes Enable High-Rate Electrochemical Ammonia Recovery	energy demand without considering H2 production	Ni decorated membrane electrode in cathode chamber	Synthetic	4000	0.0470588	0.8	84	22	/	/	/	1.61	36.2	Membrane contractor
40	MEC				separated Ni foam and PP membrane		4000	1.41176	0.8	108	22	/	/	/	1.93	25.7
41	MEC	10	Passive separation of recovered ammonia from catholyte for reduced energy consumption in microbial electrolysis cells	/	cathode chamber in sute active aeration	Synthetic	3000	12.8mA	0.8	24	20	0.95	2.2	0.901	2.3	/	Aeration in cathode compartment
42	MEC				passive separation with H2 roduction		3000	12.5mA	0.8	24	20	0.93	1	0.73	1.3	/
43	MEC	11	Nutrient-energy-water recovery from synthetic sidestream centrate using a microbial electrolysis cell - forward osmosis hybrid system	Net energy consumption, with recovered hydrogen energy deducted		Synthetic	1000	0.5		24/cycle	20	0.73	1.1		1.17		Stripping column or tank
44	MEC	12	Recovering Nitrogen as a Solid without Chemical Dosing: Bio-Electroconcentration for Recovery of Nutrients from Urine	/		Synthetic	5880	29.3	1.46		22	0.597	2.38	0.14	9.51	/	No
45	MFC	13	Ammonium recovery and energy production from urine by a microbial fuel cell	/		Urine	4000	0.5	/	/	/	/	/	0.114	3.03611	/	Acid trap tank
46	MEC	14	Ammonia recovery from wastewater using a bioelectrochemical membrane-absorbed ammonia system with authigenic acid and base	/	Salt concentration in the desalination chamber = 150 mM	Synthetic	1120.8	/	1	24	25	0.56732	2.9703	0.269281	/	/	Membrane contractor
47	MEC				Salt concentration in the desalination chamber = 300 mM	Synthetic	1120.8	/	1	24	25	0.661438	2.91089	0.303268	/	/
48	MEC				Salt concentration in the desalination chamber = 600 mM	Synthetic	1120.8	/	1	24	25	0.718954	2.37624	0.350327	/	/
49	MEC				Salt concentration in the desalination chamber = 150 mM	Synthetic	1120.8	/	1.2	24	25	0.641509	3.14851	0.389937	/	/
50	MEC				Salt concentration in the desalination chamber = 150 mM	Synthetic	1120.8	/	1.4	24	25	0.659119	2.55446	0.548428	/	/
51	MEC				Salt concentration in the desalination chamber = 150 mM	Synthetic	560.4	/	1	24	25	0.861803	3.14851	0.604292	/	/
52	MEC				Salt concentration in the desalination chamber = 150 mM	Synthetic	280.2	/	1	24	25	0.971674	4.21782	0.679828	/	/
Two-compartment electrochemical cells separated by ion-exchange membranes (EC-IEM)
Index	Classification	No.	Title	Special condition	Wastewater Type	TAN(mg/L)	Current Density(A/m2) (constant or peak)	Constant voltage(V) (constant or peak)	Time(h)	Temperature(℃)	Ammonia removal efficiency	Ammonia removal SEC(kwh/kg N)	Ammonia recovery efficiency	Ammonia recovery SEC(kwh/kg N)	Ammonia recovery rate/nitrogen flux (g N/m2/d) EC	Stripping unit type
1	EC-IEM	15	Ammonia concentration and recovery in an up-scaled electrochemical cell through screening of cation exchange membrane	CSE- 2L acolyte volume - up scale 100L	Synthetic	2800	62.5	<2.9	20	/	0.19	8.19	0	/	527.7	Membrane contractor
2	EC-IEM			CSE- 2L acolyte volume - up scale 100L	Synthetic	2800	125	<3.2	20	/	0.445	13.12	0	/	723.005
3	EC-IEM			CSE- 2L acolyte volume - up scale 100L	Synthetic	2800	250	<4	20	/	0.646	22.7	0.0137966	/	1038.05
4	EC-IEM			CSE- 0.5L acolyte volume	Synthetic	2800	250	/	20	/	0.79	92.1725	0.06	/
5	EC-IEM			CSE- 1L acolyte volume	Synthetic	2800	250	/	20	/	0.615	41.853	0.0376569	/
6	EC-IEM			CSE- 2L acolyte volume	Synthetic	2800	250	/	20	/	0.478	27.1565	0.0188679	/	801
7	EC-IEM			CSE- 2L acolyte volume	Synthetic	2800	62.5	<2.6	20	/	0.255859	9.00322	0	/	448.276
8	EC-IEM			CSE- 2L acolyte volume	Synthetic	2800	125	<2.9	20	/	0.404624	12.8617	0	/	706.897
9	EC-IEM			CSE- 2L acolyte volume	Synthetic	2800	250	<3.2	20	/	0.484127	24.4373	0.0198413	/	798.851
10	EC-IEM			CSE- 2L acolyte volume	Synthetic	2800	500	<3.5	20	/	0.741935	33.3119	0.0512334	/	1307.47
11	EC-IEM			CSE- 2L acolyte volume	Synthetic	2800	1000	<4.4	20	/	0.903614	74.0836	0.0883534	/	1502.87
12	EC-IEM			Aquivion E98-15S - 0.12L acolyte volume	Synthetic	2800	250	<2.9	1	/	0.585413	18.5331	/	/	925.714
13	EC-IEM			Nafion 117 - 0.12L acolyte volume	Synthetic	2800	250	<2.9	1	/	0.432253	27.5826	/	/	630.476
14	EC-IEM			Nafion212 - 0.12L acolyte volume	Synthetic	2800	250	<2.9	1	/	0.443598	22.562	/	/	794.286
15	EC-IEM			InnoSep-C - 0.12L acolyte volume	Synthetic	2800	250	<2.9	1	/	0.56953	17.6033	/	/	982.857
16	EC-IEM			InnoSep-C102PF - 0.12L acolyte volume	Synthetic	2800	250	<2.9	1	/	0.447002	23.4777	/	/	746.667
17	EC-IEM			CSE - 0.12L acolyte volume	Synthetic	2800	250	<2.9	1	/	0.637601	16.4876	/	/	1074.29
18	EC-IEM			CXP-S - 0.12L acolyte volume	Synthetic	2800	250	<2.9	1	/	0.549109	21.1983	/	/	853.333
19	EC-IEM	16	Ammonia Recovery from Domestic Wastewater Using a Proton-Mediated Redox Couple	/	Synthetic	70.05	4.8	0.2	/	25	0.52	1.2	/	6.4	27	Membrane contractor
20	EC-IEM				Synthetic	70.05	9.6	0.47	/	25	0.58	3.2	/	9.1	33.8
21	EC-IEM				Synthetic	70.05	19.2	0.28	/	25	0.64	12.6	/	25.6	38.7
22	EC-IEM	17	Building an operational framework for selective nitrogen recovery via electrochemical stripping	Not account pump energy, batch operation	Synthetic	3000	/	/	/	/	0.95	260	0.59	/		Membrane contractor
23	EC-IEM			/	Synthetic	3000	/	10	/	/	0.61	62.5	/	/	139.6
24	EC-IEM				Synthetic	300	100	16	0.5		0.61	116.667	/	/	101.4
25	EC-IEM	18	Chemical-free electrochemical system with membrane cathode assembly enables efficient ammonia recovery from urine	batch	Synthetic	3700	20	2	5 h	25	0.47	10.8	0.805	/	199.2	Membrane contractor
26	EC-IEM			batch	Synthetic	3700	40	2	5 h	25	0.519	14.8	0.951	/	338.4
27	EC-IEM			batch	Synthetic	3700	60	2	5 h	25	0.784	20.4	0.91	/	470.4
28	EC-IEM			batch	Synthetic	3700	80	2	5 h	25	0.822	31.3	0.882	/	446.4
29	EC-IEM			batch	Synthetic	3700	100	2	5 h	25	0.892	44.3	0.814	/	462.72
30	EC-IEM			Continuous operation	Synthetic	3700	60	2	HRT =70min	25	0.532	21.1494	0.8108	/	525.574
31	EC-IEM			Continuous operation	Synthetic	3700	60	2	HRT =140min	25	0.5349	18.461	0.9289	/	484.303
32	EC-IEM			Continuous operation	Synthetic	3700	60	2	HRT =210min	25	0.6643	17.8377	0.9132	/	544.111
33	EC-IEM			Continuous operation	Synthetic	3700	60	2	HRT =280min	25	0.7269	19.5422	0.9346	/	465.6
34	EC-IEM			Continuous operation	Real hydrolyzed urine	10639.3	60	2	96h	25	0.842	33.1	0.784	/	348
35	EC-IEM	19	Electrochemical ammonia accumulation and recovery from ammonia-rich livestock wastewater	Accumulation in fed-batch operation	Real livestock wastewater	3000	938	<8.7	6.66667	25	0.937	28.2	/	/	5975	Acid trap tank
36	EC-IEM			batch	Synthetic	3000	313	4.3	0.666667	25	0.158819	17.6	/	/	1839.4
37	EC-IEM			batch	Synthetic	3000	625	5.3	0.666667	25	0.304799	26.4	/	/	3020.6
38	EC-IEM			batch	Synthetic	3000	938	6.1	0.666667	25	0.381707	36.8	/	/	3712.5
39	EC-IEM			batch	Synthetic	3000	1250	6.9	0.666667	25	0.44	47.1	/	/	4404.4
40	EC-IEM	20	Electrochemical Ammonia Recovery from Source-Separated Urine for Microbial Protein Production	Acid as absorbent-H2 and O2 energy deduction accounted	Real urine	5490	20	2.7	/	/	0.871	1.9		5.8	0.57	Striping Column
41	EC-IEM			HOB as absorbent	Real urine	5490	20	2.7	/	/	0.684	3.6	0.133	19.4
42	EC-IEM			HOB absorbent-H2 and O2 energy deduction accounted	Real urine	5490	20	2.7	/	/	0.684	2.6	0.133	13.9
43	EC-IEM	21	Electrochemical Nutrient Recovery Enables Ammonia Toxicity Control and Biogas Desulfurization in Anaerobic Digestion	Only energy consumption during the stable operation phase is included	Real AD		10			34	0.282	17	/	/	47	No
44	EC-IEM	22	Electrochemical resource recovery from digestate to prevent ammonia toxicity during anaerobic digestion	Anode flow rate = 0.5 L/d	Real digestate	2120	10	2.83	HRT(anode) = 6，HRT(cathode)=9.6h	20	0.38	13	80%-100%	/	53	Striping+Absorption column
45	EC-IEM			Anode flow rate = 0.5 L/d	Real digestate	2120	20	3.17	HRT(anode) = 6，HRT(cathode)=9.6h	20	0.58	16.7	80%-100%	/	91.3
46	EC-IEM			Anode flow rate = 0.5 L/d	Real digestate	2120	30	3.46	HRT(anode) = 6，HRT(cathode)=9.6h	20	0.63	26	80%-100%	/	97.6
47	EC-IEM			Anode flow rate = 0.5 L/d	Synthetic	5000	10	2.73	HRT(anode) = 6，HRT(cathode)=7h	20	0.25	6.7	32%-67%	/	94.53
48	EC-IEM			Anode flow rate = 0.5 L/d	Synthetic	5000	20	2.99	HRT(anode) = 6，HRT(cathode)=7h	20	0.34	11.1	32%-67%	/	124.38
49	EC-IEM			Anode flow rate = 0.5 L/d	Synthetic	5000	30	3.35	HRT(anode) = 6，HRT(cathode)=7h	20	0.41	16.8	32%-67%	/	145.81
50	EC-IEM			Anode flow rate = 0.5 L/d	Synthetic	1000	20	4.04	HRT(anode) = 6，HRT(cathode)=7h	20	0.57	40.9	32%-67%	/	41.82
51	EC-IEM			Anode flow rate = 0.5 L/d	Synthetic	3000	20	3.26	HRT(anode) = 6，HRT(cathode)=7h	20	0.41	18.9	32%-67%	/	94.68
52	EC-IEM			Anode flow rate = 0.5 L/d	Synthetic	5000	20	2.99	HRT(anode) = 6，HRT(cathode)=7h	20	0.34	11.1	32%-67%	/	128.86
53	EC-IEM			Anode flow rate = 0.5 L/d	Synthetic	5000	10	2.56	HRT(anode) = 6，HRT(cathode)=7h	20	0.23	6.9	32%-67%	/	99.54
54	EC-IEM			Anode flow rate = 8 L/d	Synthetic	5000	10	2.55	HRT(anode) = 6，HRT(cathode)=7h	20	0.02	5.3	32%-67%	/	114.32
55	EC-IEM			Anode flow rate = 16 L/d	Synthetic	5000	10	2.57	HRT(anode) = 6，HRT(cathode)=7h	20	0.01	5	32%-67%	/	120
56	EC-IEM	23	Electrochemical Stripping to Recover Nitrogen from Source-Separated Urine	Continuous operation	Real urine	7490	100	/	HRT=1.22h	/	0.606	8.5	0.496	/	1710	Membrane contractor
57	EC-IEM			Continuous operation	AS	3400	/	/	/	/	/	17.9944	/	/
58	EC-IEM			Continuous operation	Synthetic	7950	/	/	/	/	/	11.1653	/	/
59	EC-IEM	24	Electrochemically driven extraction and recovery of ammonia from human urine	/	Synthetic	6500	10	/	HRT=2.77		0.0969101	5.39288			117.371	Striping+Absorption column
60	EC-IEM			/	Synthetic	6500	10	/	HRT=2.82	/	0.125	4.63691	/	/	136.665
61	EC-IEM				Synthetic	6500	10	/	HRT=3.71	/	0.119382	5.84537	/	/	108.009
62	EC-IEM				Synthetic	6500	10	/	HRT=4.06	/	0.144663	5.5951	/	/	107.121
63	EC-IEM				Synthetic	6500	10	/	HRT=5.45	/	0.200843	5.43349	/	/	117.836
64	EC-IEM				Synthetic	6500	10	/	HRT=6.25	/	0.205056	5.96943	/	/	104.297
65	EC-IEM				Synthetic	6500	10	/	HRT=8.29	/	0.272472	6.03498	/	/	105.69
66	EC-IEM				Synthetic	6500	10	/	HRT=12.37	/	0.417135	5.32589	/	/	105.119
67	EC-IEM				Synthetic	6500	30	3.3	HRT=2.77	/	0.167135	10.8831	/	/	211.356
68	EC-IEM				Synthetic	6500	30	3.3	HRT=2.82	/	0.233146	9.48297	/	/	249.112
69	EC-IEM				Synthetic	6500	30	3.3	HRT=3.71	/	0.34691	7.35817	/	/	313.605
70	EC-IEM				Synthetic	6500	30	3.3	HRT=4.06	/	0.365169	8.28417	/	/	283.347
71	EC-IEM				Synthetic	6500	30	3.3	HRT=5.45	/	0.412921	10.4194	/	/	221.893
72	EC-IEM				Synthetic	6500	30	3.3	HRT=6.25	/	0.532303	9.41461	/	/	252.83
73	EC-IEM				Synthetic	6500	30	3.3	HRT=8.29	/	0.793539	8.1639	/	/	307.928
74	EC-IEM				Synthetic	6500	30	3.3	HRT=12.37	/	0.800562	12.1886	0.575	/	210.014
75	EC-IEM				Synthetic	6500	50	5	HRT=2.77	/	0.370787	8.83846	/	/	402.68
76	EC-IEM				Synthetic	6500	50	5	HRT=2.82	/	0.377809	11.1637	/	/	502.551
77	EC-IEM				Synthetic	6500	50	5	HRT=3.71	/	0.463483	12.9884	/	/	343.81
78	EC-IEM				Synthetic	6500	50	5	HRT=4.06	/	0.580056	10.1606	/	/	446.986
79	EC-IEM				Synthetic	6500	50	5	HRT=5.45	/	0.731742	11.3437	/	/	402.316
80	EC-IEM				Synthetic	6500	50	5	HRT=6.25	/	0.807584	12.468	/	/	386.256
81	EC-IEM				Synthetic	6500	50	5	HRT=8.29	/	0.870787	12.0853	/	/	384.295
82	EC-IEM				Synthetic	6500	50	5	HRT=12.37	/	0.849719	19.2756	/	/	247.774
83	EC-IEM			Real urine+normal stripper	Real urine	4800	40	3.7	46.33	/	0.763916	13.6115	0.76	/	322.58
84	EC-IEM			Real urine+normal stripper	Real urine	4800	40	3.7	70.5102	/	0.757215	12.2739	0.76	/	271.917
85	EC-IEM			Real urine+normal stripper	Real urine	4800	40	3.7	94.6517	/	0.749574	12.5414	0.76	/	274.876
86	EC-IEM			Real urine+normal stripper	Real urine	4800	40	3.7	142.939	/	0.753194	12.6306	0.76	/	275.722
87	EC-IEM			Real urine+normal stripper	Real urine	4800	40	3.7	165.359	/	0.747445	13.0318	0.76	/	274.329
88	EC-IEM			Real urine+normal stripper	Real urine	4800	40	3.7	190.079	/	0.74264	13.2994	0.76	/	271.493
89	EC-IEM			Real urine+normal stripper	Real urine	4800	40	3.7	214.505	/	0.751068	12.7197	0.76	/	278.801
90	EC-IEM			Real urine+ stripper with authigentic acid from anode	Real urine	5100	40	3.6	42.9424	/	0.763925	14.8153	0.58	/	237.065
91	EC-IEM			Real urine+ stripper with authigentic acid from anode	Real urine	5100	40	3.6	69.9608	/	0.750596	14.5478	0.58	/	236.408
92	EC-IEM			Real urine+ stripper with authigentic acid from anode	Real urine	5100	40	3.6	92.9418	/	0.72404	14.5478	0.58	/	254.582
93	EC-IEM			Real urine+ stripper with authigentic acid from anode	Real urine	5100	40	3.6	140.968	/	0.706867	16.5096	0.58	/	218.471
94	EC-IEM			Real urine+ stripper with authigentic acid from anode	Real urine	5100	40	3.6	164.87	/	0.667065	21.8599	0.79	/	154.763
95	EC-IEM			Real urine+ stripper with authigentic acid from anode	Real urine	5100	40	3.6	186.742	/	0.667943	28.949	0.79	/	115.687
96	EC-IEM			Real urine+ stripper with authigentic acid from anode	Real urine	5100	40	3.6	208.324	/	0.650852	41.1656	0.79	/	80.9589
97	EC-IEM	25	Electrolyte-free electrochemical ammonia stripping integrated with flocculation for efficient nitrogen recovery from swine manure biogas slurry	EAS-WOE, biop	Real swine manure biogas slurry	1444.68	250	/	8	25	0.9	/	0.00123488	0.5	396	Acid trap tank
98	EC-IEM			EAS-WE，cathode fed	Real swine manure biogas slurry	1444.68	350	/	8	25	0.86	/	0.000286569	0.9	/
99	EC-IEM	26	Flexible Electrochemical Stripping for Wastewater Ammonia Recovery with On-Demand Product Tunability	Continuous	Real urine	4950	625	/	384	25	0.881	46.1111	0.307	130.556	/	Membrane contractor
100	EC-IEM			Continuous	Real urine		/	/	384	25	0.881	46.1111	46.5%%	87.3028	/
101	EC-IEM	27	Gas-diffusion-electrode based direct electro-stripping system for gaseous ammonia recovery from livestock wastewater	GDE ES, continuous operation，air flow =20ml/min	Synthetic	3000	100	/	24	25	N/A	7.42	0.00103704	/	890	GDE+Acid trap Tank
102	EC-IEM			GDE ES, continuous operation，air flow =20ml/min	Real livestock wastewater	3000	100	/	24	25	N/A	9.44	0.000876157	/	770
103	EC-IEM	28	Hybrid Donnan dialysis–electrodialysis for efficient ammonia recovery from anaerobic digester effluent	First DD then ED 3 cycles	Real anaerobic digestion effluent	952	15	15	60	/	0.82	4	0.71	/	98.2	Membrane contractor
104	EC-IEM			First DD then ED 3 cycles	Synthetic	700	15	15	55	/	0.955	4.8	0.856	/	106.5
105	EC-IEM			First DD then ED	Synthetic	140	15	15	15	/	0.95	5.162	0.8931	/	25.6803
106	EC-IEM			First DD then ED	Synthetic	280	15	15	15	/	0.95	4.694	0.8254	/	47.619
107	EC-IEM			First DD then ED	Synthetic	700	15	15	15	/	0.95	4.496	0.7344	/	94.7279
108	EC-IEM	29	Integrating solvent extraction with electrochemical separation for nutrient recovery from anaerobically digested sludge	/	Real anaerobically digested sludge	712	60	<10	0.5	/	0.739919	18.8492	0.722912	/	/	Solvent extraction+Acid trap tank
109	EC-IEM				Real anaerobically digested sludge	712	60	<10	1	/	0.590726	25.3968	0.714687	/	/
110	EC-IEM				Real anaerobically digested sludge	712	60	<10	1.5	/	0.530242	31.1508	0.712225	/	/
111	EC-IEM				Real anaerobically digested sludge	712	60	<10	2	/	0.425403	38.4921	0.711778	/	/
112	EC-IEM	30	Load ratio determines the ammonia recovery and energy input of an electrochemical system	LN=0.22	Synthetic	3920	10	/	20-40 h	25	0.27	0.0833333	0.27	/	152	Membrane contractor
113	EC-IEM			LN=0.45	Synthetic	3920	20	/	20-40 h	25	0.43	0.305556	0.37	/	240
114	EC-IEM			LN=1.2	Synthetic	3920	10	/	20-40 h	25	0.94	0.638889	0.83	/	98
115	EC-IEM			LN=1.33	Synthetic	3920	50	/	20-40 h	25	0.92	2.73077	0.84	/	432.995
116	EC-IEM			LN=2.54	Synthetic	3920	20	/	20-40 h	25	0.99	13.6667	0.93	/	98
117	EC-IEM			LN=6.16	Synthetic	3920	50	/	20-40 h	25	1	45.75	1.01	/	101
118	EC-IEM			LN=1.18	Real urine	4250	50	/	20-40 h	25	0.63	3.94444	0.56	/	335
119	EC-IEM			LN=2.72	Real urine	4250	20	/	20-40 h	25	0.89	4.02778	0.83	/	82
120	EC-IEM			LN=6.48	Real urine	4250	50	/	20-40 h	25	0.92	13.2222	0.77	/	89
121	EC-IEM	31	Long-Term Robustness and Failure Mechanisms of Electrochemical Stripping for Wastewater Ammonia Recovery	batch	Staged anaerobic fluidized MBR effluent	53	10	/	8	/	0.9868	96.9426	0.8987	109.993	/	Membrane contractor
122	EC-IEM			batch	Reverse osmosis concentrate from full advanced treatment of municipal wastewater	209	50	/	6	/	0.989	134.228	0.7753	168.333	/
123	EC-IEM			batch	Fecal sludge treatment plant (FSTP) effluen	349	100	/	6	/	0.9978	792.319	1.011	805.556	/
124	EC-IEM			batch	Real AD	692	25	/	6	/	0.9185	48.4713	0.967	50.3356	/
125	EC-IEM			batch	Real AD	1820	50	/	6	/	0.9427	14.9142	0.8943	13.6667	/
126	EC-IEM			batch	Real AD	2180	50	/	6	/	0.9604	20.5071	0.8348	13.6667	/
127	EC-IEM			Continuous operation	Real urine	5050	10	/	121.394	/	0.8072	16.993	0.7679	17.9615	672
128	EC-IEM			Continuous operation	Real urine	5050	10	/	238.723	/	0.8447	17.5277	0.6911	21.255	672
129	EC-IEM			Continuous operation	Real urine	5050	10	/	358.778	/	0.8242	17.6601	0.715	20.3592	672
130	EC-IEM			Continuous operation	Real urine	5050	10	/	460.267	/	0.8259	17.2776	0.7406	19.535	672
131	EC-IEM			Continuous operation	Real urine	5050	10	/	574.366	/	0.8276	17.2404	0.7457	19.2012	672
132	EC-IEM			Continuous operation	Real urine	5050	10	/	680.477	/	0.8294	17.4474	0.727	19.6068	672
133	EC-IEM			Continuous operation	Real urine	5050	10	/	791.429	/	0.8328	17.4095	0.7474	19.2746	672
134	EC-IEM			Continuous operation	Real urine	5050	10	/	886.392	/	0.8481	16.2885	0.7526	18.3495	672
135	EC-IEM			Continuous operation	Unmodieied urine	5120	10	/	48	/	0.808	11.8203	0.674	18.3872	605.854
136	EC-IEM			Continuous operation	ultraslow- flush urine	2570	10	/	48	/	0.831	32.8342	0.786	34.1476	284.489
137	EC-IEM			Continuous operation	standard-flush urine	240	10	/	48	/	0.955	495.141	0.883	538.482	34.2403
138	EC-IEM			Continuous operation	50% divalent amended	5900	10	/	48	/	0.799	17.0738	0.655	17.0738	666.438
139	EC-IEM			Continuous operation	100% divalent amended	5000	10	/	48	/	0.794	11.8203	0.652	17.0738	550.541
140	EC-IEM			Continuous operation	50% hydrolyzed urine	3930	10	/	48	/	0.817	18.3872	0.735	24.954	408.292
141	EC-IEM			Continuous operation	100% hydrolyzed urine	1920	10	/	48	/	0.692	51.2214	0.761	47.2813	171.219
142	EC-IEM	32	Membrane stripping enables effective electrochemical ammonia recovery from urine while retaining microorganisms and micropollutants	EC+MC	Real urine	4622	20	/	/	25	0.49	4.6	0.387	6.3	/	Membrane contractor/Column
143	EC-IEM			EC+stripping column	Real urine	4622	20	/	/	25	0.451	5.9	0.17	12.2	/
144	EC-IEM			EC+stripping column+acid absorption	Real urine	4622	20	/	/	25	87.1%%	1.9	0.25	5.8	/
145	EC-IEM	33	Prototyping and modelling a photovoltaic-thermal electrochemical stripping system for distributed urine nitrogen recovery	/	Real urine	4455	50	/	7	22	0.46	7.46667	0.22	18.599	/	Membrane contractor
146	EC-IEM				Real urine	4455	100	3.6	7	22	0.5999	10.3382	0.3552	17.2861	/
147	EC-IEM				Real urine	4455	150		7	22	0.7738	12.8019	0.5052	20.4348	/
148	EC-IEM				Real urine	4455	200		7	22	0.91	16.8116	0.69	22.657	/
149	EC-IEM			outdoor trial 1 with hear transfer,a direct connection to the solar panel	Real urine	3332	194	/	7	11-24	0.906627	11.7611	0.89759	21.0944	/
150	EC-IEM			outdoor trial 2 without hear transfer,a direct connection to the solar panel	Real urine	3460	194	/	7	11-24	0.942197	14.8694	0.595376	15.6028	/
151	EC-IEM			outdoor trial 2 with hear transfer,a direct connection to the solar panel	Real urine	5510	194	/	7	11-24	0.932849	16.7833	0.520871	16.9417	/
152	EC-IEM			Solar Simulator – No heat transfer, direct connection	Real urine	4120	194	/	2.5	25-38.3	0.444444	13.5373	0.155039	37.7989	/
153	EC-IEM			Solar Simulator – Heat transfer, direct connection	Real urine	4120	194	/	2.5	25-38.3	0.470886	13.0098	0.192405	29.7117	/
154	EC-IEM			Solar Simulator – No heat transfer, charge controllers	Real urine	4120	78	/	2.5	25-38.3	0.239583	9.31786	0.0598958	37.6231	/
155	EC-IEM			Solar Simulator – Heat transfer, charge controllers	Real urine	4120	78	/	2.5	25-38.3	0.239583	10.0211	0.0598958	27.7778	/
156	EC-IEM	34	Enhanced electrodialysis by electric double-layer capacitors to minimize membrane use in digestate ammonia recovery: mechanisms and effects	/	Real livestock digestate	790	/	/	3.5	/	0.988	15.3	/	/	/	Striping+Absorption column or tank
157	EC-IEM					790	/	/		/	0.806	10.2	/	/	/
158	EC-IEM	35	Ammonia-selective recovery from anaerobic digestate using electrochemical ammonia stripping combined with electrodialysis	/	ED concentrate	2681	200	/	5	35	0.918772		0.905	11.6	/	Membrane contractor
159	EC-IEM	36	Simultaneous nitrogen and phosphorus recovery from municipal wastewater by electrochemical pH modulation	/	Municipal primary effluent	24.76		/	4		0.93	27.0554	/	/	/	Striping+Absorption column
Electrodialysis cells		Electrodialysis (EC)
Index		No.	Title	Special condition	Wastewater Type	TAN(mg/L)	Current Density(A/m2) (constant or peak)	Constant voltage(V) (constant or peak)	Time(h)	Temperature(℃)	Ammonia removal efficiency (EC)/migration efficiency(EC)	Ammonia removal SEC(kwh/kg N)	Ammonia recovery efficiency（stripper）	Ammonia recovery SEC(kwh/kg N)	Ammonia recovery rate/nitrogen flux (g N/m2/d) EC	Electrochemical cell configuration	Stripping unit type	Classification
1	ED	37	A stacked transmembrane electro-chemisorption system connected by hydrophobic gas permeable membranes for on-site utilization of authigenic acid and base to enhance ammonia recovery from wastewater	Cathode chamber Aeration flow=3.2	Real	7600	62.5	/	4	25	/	/	0.7556	10.1	/	4 pairs of AEM+CEM stack	Membrane contractor	Membrane contractor
2	ED			Cathode chamber Aeration flow=3.2	Synthetic	7500	62.5	/	4	25	/	/	0.693	10.5	/
3	ED			/	Real	7600	62.5	/	4	25	0.631	/	0.615	16.5	/
4	ED				Real	7600	62.5	/	8	25	0.854271	/	0.78727	25.55	/
5	ED				Real	7600	62.5	/	12	25	0.931323	/	0.862647	42.3	/
6	ED				Real	7600	62.5	/	16	25	0.931323	/	0.902848	67.31	/
7	ED				Real	7600	62.5	/	20	25	0.954774	/	0.909548	91.98	/
8	ED				Real	7600	62.5	/	24	25	0.931	/	0.863	116.65	/
9	ED			Electrodes and GPM Position 1	Real	7600	62.5	/	4	25	/	/	0.641924	16.7	/
10	ED			Electrodes and GPM Position 2	Real	7600	62.5	/	4	25	/	/	0.591065	16.95	/
11	ED			Electrodes and GPM Position 3	Real	7600	62.5	/	4	25	/	/	0.530584	18.65	/
12	ED			Electrodes and GPM Position 4	Real	7600	62.5	/	4	25	/	/	0.483849	18.75	/
13	ED			Aeration flow=0	Real	7600	62.5	/	4	25	/	/	0.615265	16.74	/
14	ED			Aeration flow=0.8	Real	7600	62.5	/	4	25	/	/	0.707165	14.48	/
15	ED			Aeration flow=1.6	Real	7600	62.5	/	4	25	/	/	0.772586	14.19	/
16	ED			Aeration flow=2.4	Real	7600	62.5	/	4	25	/	/	0.838006	13.58	/
17	ED			Aeration flow=3.2	Real	7600	62.5	/	4	25	/	/	0.931464	12.5	/
18	ED			Aeration flow=4	Real	7600	62.5	/	4	25	/	/	0.900312	13.22	/
19	ED	38	Ammonia recovery from anaerobic digester centrate using onsite pilot scale bipolar membrane electrodialysis coupled to membrane stripping	C50 low	Real	484	50	/	5	/	0.18091	17.7	/	/	144.2	BPM-ED(bipolar-electrodialysis) stack	Membrane contractor	Membrane contractor
20	ED			C50 high	Real	484	50	/	5	/	0.348458	11.8	/	/	178.8
21	ED			C75 high	Real	484	75	/	5	/	0.14699	35.8	/	/	193.3
22	ED			D50 low	Real	484	75	/	20	/	0.221253	6.6	/	/	41.9
23	ED			D50 high	Real	484	100	/	20	/	0.283243	7.5	/	/	41.7
24	ED			D75 low1	Real	484	50	/	20	/	0.309946	6.5	/	/	74.6
25	ED			D75 low2	Real	484	50	/	20	/	0.304223	6.3	/	/	74.9
26	ED			D100 high	Real	484	75	/	20	/	0.354768	13.3	/	/	89.7
27	ED	39	Ammonia recovery in bipolar membrane electrodialysis via pH control through electric current pulse modulation	constant current (CC)	Real	700	40	/	20	35	0.88209	3.79434	/	/	/	Selective electrodialysis reversal (SEDR) + BPM-ED	Vacuum membrane contactor	Membrane contractor
28	ED			constant current (CC)	Real	700	40	/	30	35	0.858955	3.75669	/	/	/
29	ED			constant current (CC)	Real	700	75	/	20	35	0.820149	13.9224	/	/	/
30	ED			constant current (CC)	Real	700	75	/	30	35	0.790299	15.466	/	/	/
31	ED			constant current (CC)	Real	700	85	/	20	35	0.75597	14.2612	/	/	/
32	ED			constant current (CC)	Real	700	85	/	30	35	0.709701	15.579	/	/	/
33	ED			constant current (CC)	Real	700	120	/	20	35	0.729104	18.4404	/	/	/
34	ED			constant current (CC)	Real	700	120	/	30	35	0.671642	21.716	/	/	/
35	ED			bipolar membrane electrodialysis (BPMC)，pH=9.2	Real	700	75	/	20	35	0.918216	5.64589	/	/	/
36	ED			bipolar membrane electrodialysis (BPMC)，pH=9.2	Real	700	75	/	30	35	0.886989	7.1891	/	/	/
37	ED			bipolar membrane electrodialysis (BPMC)，pH=9.5	Real	700	75	/	20	35	0.798513	5.19422	/	/	/
38	ED			bipolar membrane electrodialysis (BPMC)，pH=9.5	Real	700	75	/	30	35	0.751673	7.3773	/	/	/
39	ED			bipolar membrane electrodialysis (BPMC)，pH=10	Real	700	75	/	20	35	0.759108	6.17284	/	/	/
40	ED			bipolar membrane electrodialysis (BPMC)，pH=10	Real	700	75	/	30	35	0.686989	7.86661	/	/	/
41	ED			bipolar membrane electrodialysis (BPMC)，pH=10.5	Real	700	85	/	20	35	0.688476	6.02228	/	/	/
42	ED			bipolar membrane electrodialysis (BPMC)，pH=10.5	Real	700	85	/	30	35	0.639405	9.67329	/	/	/
43	ED	40	Pulsed electric field drives chemical-free membrane stripping for high ammonia recovery from urine	/	/	3700	20	/	/	25	0.745	/	0.818	11.5	290.4	ED	Membrane contractor	Membrane contractor
44	ED				/	3700	40	/	/	25	0.993	/	0.823	18.3	403.2
45	ED				/	3700	60	/	/	25	0.994	/	0.825	28	415.2
46	ED				/	3700	80	/	/	25	0.892	/	0.842	19.5	660
47	ED				/	3700	20	/	/	25	0.979	/	0.848	9.2	434.4
48	ED				/	3700	40	/	/	25	0.999	/	0.879	19.9	518.4
49	ED				/	3700	60	/	/	25	0.997	/	0.893	26.9	648
50	ED				/	3700	80	/	/	25	0.941	/	0.774	40.9	782.4
51	ED				/	3700	20	/	/	25	0.933	/	0.724	15.4	468
52	ED				/	3700	40	/	/	25	0.989	/	0.855	21.1	844.8
53	ED				/	3700	60	/	/	25	0.985	/	0.871	23.8	1128
54	ED				/	3700	80	/	/	25	0.979	/	0.927	31	1176
55	ED				/	3700	20	/	/	25	0.77	/	0.911	17.3	516
56	ED				/	3700	40	/	/	25	0.988	/	0.896	19.8	883.2
57	ED				/	3700	60	/	/	25	0.974	/	0.872	29.3	1123.2
58	ED				/	3700	80	/	/	25	0.996	/	0.883	33.9	1130.4
59	ED				/	3700	80	/	/	25	0.845	/	0.798	55.1	652.8
60	ED				/	3700	80	/	/	25	0.701	/	0.831	29.9	900
61	ED				/	3700	80	/	/	25	0.549	/	0.699	41.1	1108.8
62	ED				/	3700	53	/	/	25	0.684	/	0.809	20.9	972
63	ED				/	3700	80	/	/	25	0.677	/	0.942	22.2	859.2
64	ED				/	3700	80	/	/	25	0.671	/	0.947	19.1	924
65	ED				/	3700	80	/	/	25	0.576	/	0.911	17.5	724.8
66	ED				/	3700	80	/	/	25	0.54	/	0.899	15.5	751.2
67	ED				/	3700	80	/	/	25	0.731	/	0.912	25.1	799.2
68	ED				/	3700	80	/	/	25	0.72	/	0.743	28.9	842.4
69	ED				/	3700	80	/	/	25	0.768	/	0.735	39.9	669.6
70	ED	41	Bipolar Membrane Electrodialysis for Ammonia Recovery from Synthetic Urine: Experiments, Modeling, and Performance Analysis	Batch	Synthetic	3772	10	/	7	25	/	/	0.371	24.9941	/	BPM-ED	Membrane contractor	Membrane contractor
71	ED			Batch	Synthetic	3772	20	/	7	25	/	/	0.67	25.7515	/
72	ED			Batch	Synthetic	3772	40	/	7	25	/	/	0.7134	42.6896	/
73	ED			Batch	Synthetic	3772	60	/	7	25	/	/	0.75851	44.3421	/
74	ED			Batch-larg-scale with multiple membrane-model result	Synthetic	3772	20	/	/	25	/	/	0.675	7.16667	/
75	ED			Continuous-model result	Synthetic	3772	20	/	/	25	/	/	0.9	3.47222	/
76	ED	42	Behavior of solutes and membrane fouling in an electrodialysis to treat a side-stream: Migration of ions, dissolved organics and micropollutants	/	Urban wastewater	/	/	/	/	/	0.921	0.6	/	/	/
77	ED	43	Bipolar membrane electrodialysis for nutrient recovery from anaerobic digestion dewatering sidestream	/	Synthetic	700	84	/	/	/	0.83	11.6	/	/	/	BPM-ED	Membrane contractor	Membrane contractor
78	ED					700	84	/	/	/	0.74	8.9	/	/	/
79	ED					700	84	/	/	/	0.72	5.7	/	/	/
80	ED					700	51	/	/	/	0.81	7	0.99	/	/
81	ED					700	51	/	/	/	0.76	5.9	0.98	/	/
82	ED					700	51	/	/	/	0.75	4.5	0.8	/	/
83	ED	44	Electrochemical recovery of nutrients from human urine coupled with biogas upgrading	/	Synthetic spent urine	565	13	/	/	/	/	6.54762	0.7	3.49206	/	CEM+AEM	No	No
84	ED				Synthetic spent urine	565	26	/	/	/	/	6.9246	0.7	2.63889	/
85	ED				Synthetic spent urine	565	52	/	/	/	/	8.15476	0.7	2.57937	/
86	ED				Synthetic spent urine	565	77	/	/	/	/	9.12698	0.7	2.55952	/
87	ED				Synthetic hydrolyzed urine	558	13	/	/	/	/	6.62698	0.7	3.61111	/
88	ED				Synthetic hydrolyzed urine	558	26	/	/	/	/	6.8254	0.7	2.81746	/
89	ED				Synthetic hydrolyzed urine	558	52	/	/	/	/	8.29365	0.7	2.65873	/
90	ED				Synthetic hydrolyzed urine	558	77	/	/	/	/	9.46429	0.7	2.71825	/
91	ED				Real hydrolyzed urine	407	52	/	/	/	/	10.2976	0.7	2.87698	/
92	ED				Real spent urine	429	52	/	/	/	/	9.12698	0.7	2.46032	/
93	ED	45	Concurrent recovery of ammonia and phosphate by an electrochemical nutrients recovery system with authigenic acid and base	/	Synthetic	84		4	12	25	0.958	/	0.792	14.6	47.3	CEM+AEM+CEM	Membrane contractor	Membrane contractor
94	ED	46	Continuous Ammonia Recovery from Wastewaters Using an Integrated Capacitive Flow Electrode Membrane Stripping System	Carbon content=0%	Synthetic	1000	/	/	/	25	0.770701	/	0.686	45.2	/	Flow-electrode capacitive deionization (FCDI)	Membrane contractor	Membrane contractor
95	ED			Carbon content=2%	Synthetic	43	/	/	/	25	0.819533	/	0.695	35.8	/
96	ED			Carbon content=5%	Synthetic	43	/	/	/	25	0.872611	/	0.66	24.8	/
97	ED			Carbon content=10%	Synthetic	43	/	/	/	25	0.872611	/	0.53	21.2	/
98	ED			/	Synthetic	43	1.8	/	HRT=1.48min	25	0.566787	/	0.16	9.6	/
99	ED				Synthetic	43	3.4	/	HRT=1.48min	25	0.700361	/	0.38	13.3	/
100	ED				Synthetic	43	6.8	/	HRT=1.48min	25	0.873646	/	0.66	24.8	/
101	ED				Synthetic	43	10.4	/	HRT=1.48min	25	0.949458	/	0.78	48.9	/
102	ED				Synthetic	43	6.8	/	HRT=0.98min	25	0.624549	/	0.52	18.7	/
103	ED				Synthetic	43	6.8	/	HRT=1.48min	25	0.855596	/	0.65	24.8	/
104	ED				Synthetic	43	6.8	/	HRT=1.96min	25	0.906137	/	0.7591	35.79	/
105	ED				Synthetic	43	6.8	/	HRT=2.94min	25	0.945848	/	0.71	79.1	/
106	ED				Synthetic	43	6.8	/	HRT=1.48min	25	0.875598	/	0.78	20.4	/
107	ED				Synthetic	43	6.8	/	HRT=1.48min	25	0.87799	/	0.67	11	/
108	ED				Synthetic	43	6.8	/	HRT=1.48min	25	0.861244	/	0.12	70.4	/
109	ED				Real domestic wastewater	42.5	6.8	/	HRT=1.48min	25	0.159	/	0.625	25.1	/
110	ED				Synthetic urine	/	27.2	/	2	25	0.7615	/	0.583	7.8	/
111	ED				Synthetic domestic wastewater	/	6.8	/		25	0.1869	/	0.78	20.6	/
112	ED	47	Nutrient recovery from wastewater through pilot scale electrodialysis	/	Real	847	20	/	72	/	0.233	4.9	/	/	/	ED	No	No
113	ED	48	Donnan Dialysis for scaling mitigation during electrochemical ammonium recovery from complex wastewater	/	Real	1000	10	/	/	/	0.2436	5.8	/	/	/		Membrane contactor	Membrane contractor
114	ED				/	1000	10	/	/	/	0.7261	7.5	/	/	/
115	ED				/	1000	10	/	/	/	0.8381	9.68799	/	/	/
116	ED				/	1000	10	/	/	/	0.8563	12.2	/	/	/
117	ED	49	Hydrogen Gas Recycling for Energy Efficient Ammonia Recovery in Electrochemical Systems	/	/	3400	10	/	/	/	0.82	8.44444	0.64	/	/	ED	Membrane contactor	Membrane contractor
118	ED				/	3400	20	/	/	/	0.73	7.25	0.73	/	/
119	ED				/	3400	50	/	/	/	0.73	15.6389	0.6	/	/
120	ED	50	Effluent pH correlates with electrochemical nitrogen recovery efficiency at pilot scale operation	LN=1.5	/	921	50	/	/	/	0.73	29.6	/	/	/	ED
121	ED			LN=1.5	/	921	50	/	/	/	0.72	6.9	/	/	/
122	ED			LN=1	/	921	100	/	/	/	0.64	9.6	/	/	/
123	ED			LN=1	/	921	100	/	/	/	0.42	11.7	/	/	/
124	ED			LN=1.5	/	921	100	/	/	/	0.58	20.4	/	/	/
125	ED			LN=1.5	/	921	100	/	/	/	0.59	19	/	/	/
126	ED			LN=1.5	/	921	100	/	/	/	0.45	22.6	/	/	/
127	ED			LN=2.5	/	921	100	/	/	/	0.8	20	/	/	/
128	ED			LN=2.5	/	921	200	/	/	/	0.74	10.2	/	/	/
129	ED			LN=1.5	/	921	100	/	/	/	0.68	49.4	/	/	/
130	ED			LN=1.5	/	921	100	/	/	/	0.52	9.7	/	/	/
131	ED			LN=1.5	/	921	100	/	/	/	0.49	9.5	/	/	/
132	ED			LN=1.5	/	921	100	/	/	/	0.57	5.4	/	/	/
133	ED			LN=2.5	/	921	100	/	/	/	0.84	6.1	/	/	/
134	ED			LN=1.5	/	921	100	/	/	/	0.67	3.7	/	/	/
135	ED			LN=1.5	/	921	100	/	/	/	0.41	2.1	/	/	/
136	ED			LN=1.5	/	921	100	/	/	/	0.55	1.3	/	/	/
137	ED			/	/	921	100	/	/	/	0.8	13.6	/	/	/
138	ED			/	/	921	100	/	/	/	0.88	13.4	/	/	/
139	ED			/	/	921	100	/	/	/	0.83	12.7	/	/	/
140	ED	51	Exploiting Donnan Dialysis to enhance ammonia recovery in an electrochemical system	Continuous, LN =0.8, without Donnan	Synthetic	4000	20	/	/	/	0.714615	9.7	/	/	/	CEM+Donnan	Membrane contractor	Membrane contractor
141	ED			Continuous, LN =1, without Donnan	Synthetic	4000	20	/	/	/	0.803846	11.5	/	/	/
142	ED			Continuous, LN =1.3, without Donnan	Synthetic	4000	20	/	/	/	0.848462	13.4	/	/	/
143	ED			Continuous, LN =0.8, with Donnan	Synthetic	4000	20	/	/	/	0.678462	10.1	/	/	/
144	ED			Continuous, LN =1, without Donnan	Synthetic	4000	20	/	/	/	0.836923	11.7	/	/	/
145	ED			Continuous, LN =1.3, without Donnan	Synthetic	4000	20	/	/	/	0.876154	14.2	/	/	/
146	ED			Batch, LN =0.8, without Donnan	Synthetic	4000	20	/	96	/	0.606902	9.3	/	/	/
147	ED			Batch, LN =1, without Donnan	Synthetic	4000	20	/	96	/	0.677609	10.3	/	/	/
148	ED			Batch, LN =1.3, without Donnan	Synthetic	4000	20	/	96	/	0.768519	11.1	/	/	/
149	ED			Batch, LN =0.8, without Donnan	Synthetic	4000	20	/	96	/	0.728114	7.8	/	/	/
150	ED			Batch, LN =1, without Donnan	Synthetic	4000	20	/	96	/	0.78367	9	/	/	/
151	ED			Batch, LN =1.3, without Donnan	Synthetic	4000	20	/	96	/	0.85101	10.1	/	/	/
152	ED	52	A novel sustainable N recycling process: Upcycling ammonia to ammonium fertilizer from dilute wastewater and simultaneously realizing phenol degradation via a visible solar-driven PECMA system with efficient Ag2S-BiVO4 photoanodes	/	Synthetic	30	2.14	/	/	/	0.99		0.82	7.15	/	CEM+AEM	Membrane contractor	Membrane contractor
153	ED				/	50	2.71	/	/	/	0.98		0.76	6.69	/
154	ED				/	100	3.86	/	/	/	0.99		0.83	5.47	/
155	ED	53	Nitrogen potential recovery and concentration of ammonia from swine manure using electrodialysis coupled with air stripping	/	Pig mauran	3200	400	17.5		/	0.59	5.95167	0.0022	/	/	ED	Stripping tank/vacuum stripping	Vacuum stripping
156	ED				Pig mauran	3200	400	17.5		/	0.7	4.94	0.0046	/	/
157	ED	54	Ammonia-Rich Solution Production from Wastewaters Using Chemical-Free Flow-Electrode Capacitive Deionization	carbon contents = 0 wt%	Synthetic	43	9	/	3	/	0	94.4	/	/	/	Flow-electrode capacitive deionization (FCDI)-CEM+AEM	No	No
158	ED			carbon contents = 2 wt%	Synthetic	43	9	/	3	/	0	79.5	/	/	/
159	ED			carbon contents = 5 wt%	Synthetic	43	9	/	3	/	0.129302	38.5	/	/	/
160	ED			carbon contents = 10 wt%	Synthetic	43	9	/	3	/	0.186744	35.4	/	/	/
161	ED	55	Enhancing ammonia recovery through pH polarization in bipolar membrane electrodialysis	Inter-membrane distance = 0.82 mm	Synthetic	5000	/	15	0.5	/	0.169	1.69697	/	/	/	BPM-ED	No	No
162	ED			Inter-membrane distance = 0.82 mm	Synthetic	5000	/	20	0.5	/	0.308	1.80471	/	/	/
163	ED			Inter-membrane distance = 0.82 mm	Synthetic	5000	/	25	0.5	/	0.3906	2.34343	/	/	/
164	ED			Inter-membrane distance = 0.82 mm	Synthetic	5000	/	30	0.5	/	0.474	3.01684	/	/	/
165	ED			Inter-membrane distance = 0.82 mm	Synthetic	5000	/	35	0.5	/	0.46	3.82492	/	/	/
166	ED			Inter-membrane distance = 0.82 mm	Synthetic	5000	/	15	1	/	0.2798	1.88552	/	/	/
167	ED			Inter-membrane distance = 0.82 mm	Synthetic	5000	/	20	1	/	0.4182	2.66667	/	/	/
168	ED			Inter-membrane distance = 0.82 mm	Synthetic	5000	/	25	1	/	0.488	3.69024	/	/	/
169	ED			Inter-membrane distance = 0.82 mm	Synthetic	5000	/	30	1	/	0.5984	4.3367	/	/	/
170	ED			Inter-membrane distance = 0.82 mm	Synthetic	5000	/	35	1	/	0.6814	5.03704	/	/	/
171	ED			Inter-membrane distance = 0.82 mm	Synthetic	5000	/	15	1.5	/	0.3352	2.37037	/	/	/
172	ED			Inter-membrane distance = 0.82 mm	Synthetic	5000	/	20	1.5	/	0.5152	3.34007	/	/	/
173	ED			Inter-membrane distance = 0.82 mm	Synthetic	5000	/	25	1.5	/	0.626	4.41751	/	/	/
174	ED			Inter-membrane distance = 0.82 mm	Synthetic	5000	/	30	1.5	/	0.7368	5.52189	/	/	/
175	ED			Inter-membrane distance = 1.64 mm	Synthetic	5000	/	35	1.5	/	0.77836	6.81481	/	/	/
176	ED			Inter-membrane distance = 1.64 mm	Synthetic	5000	/	15	0.5	/	0.25196	1.23906	/	/	/
177	ED			Inter-membrane distance = 1.64 mm	Synthetic	5000	/	20	0.5	/	0.39048	1.69697	/	/	/
178	ED			Inter-membrane distance = 1.64 mm	Synthetic	5000	/	25	0.5	/	0.4598	2.20875	/	/	/
179	ED			Inter-membrane distance = 1.64 mm	Synthetic	5000	/	30	0.5	/	0.5014	3.09764	/	/	/
180	ED			Inter-membrane distance = 1.64 mm	Synthetic	5000	/	35	0.5	/	0.5014	3.71717	/	/	/
181	ED			Inter-membrane distance = 1.64 mm	Synthetic	5000	/	15	1	/	0.3768	1.69697	/	/	/
182	ED			Inter-membrane distance = 1.64 mm	Synthetic	5000	/	20	1	/	0.52902	2.61279	/	/	/
183	ED			Inter-membrane distance = 1.64 mm	Synthetic	5000	/	25	1	/	0.626	3.34007	/	/	/
184	ED			Inter-membrane distance = 1.64 mm	Synthetic	5000	/	30	1	/	0.7091	4.39057	/	/	/
185	ED			Inter-membrane distance = 1.64 mm	Synthetic	5000	/	35	1	/	0.7646	5.27946	/	/	/
186	ED			Inter-membrane distance = 1.64 mm	Synthetic	5000	/	15	1.5	/	0.48746	2.10101	/	/	/
187	ED			Inter-membrane distance = 1.64 mm	Synthetic	5000	/	20	1.5	/	0.63984	3.17845	/	/	/
188	ED			Inter-membrane distance = 1.64 mm	Synthetic	5000	/	25	1.5	/	0.69524	4.39057	/	/	/
189	ED			Inter-membrane distance = 1.64 mm	Synthetic	5000	/	30	1.5	/	0.77836	5.57576	/	/	/
190	ED			Inter-membrane distance = 1.64 mm	Synthetic	5000	/	35	1.5	/	0.813	7.05724	/	/	/
191	ED			Inter-membrane distance = 2.46 mm	Synthetic	5000	/	15	0.5	/	0.169	1.56229	/	/	/
192	ED			Inter-membrane distance = 2.46 mm	Synthetic	5000	/	20	0.5	/	0.3352	1.61616	/	/	/
193	ED			Inter-membrane distance = 2.46 mm	Synthetic	5000	/	25	0.5	/	0.4044	2.20875	/	/	/
194	ED			Inter-membrane distance = 2.46 mm	Synthetic	5000	/	30	0.5	/	0.4598	2.74747	/	/	/
195	ED			Inter-membrane distance = 2.46 mm	Synthetic	5000	/	35	0.5	/	0.51516	3.15152	/	/	/
196	ED			Inter-membrane distance = 2.46 mm	Synthetic	5000	/	15	1	/	0.32122	1.6431	/	/	/
197	ED			Inter-membrane distance = 2.46 mm	Synthetic	5000	/	20	1	/	0.43204	2.28956	/	/	/
198	ED			Inter-membrane distance = 2.46 mm	Synthetic	5000	/	25	1	/	0.5013	3.2862	/	/	/
199	ED			Inter-membrane distance = 2.46 mm	Synthetic	5000	/	30	1	/	0.62598	3.87879	/	/	/
200	ED			Inter-membrane distance = 2.46 mm	Synthetic	5000	/	35	1	/	0.626	4.60606	/	/	/
201	ED			Inter-membrane distance = 2.46 mm	Synthetic	5000	/	15	1.5	/	0.33508	2.23569	/	/	/
202	ED			Inter-membrane distance = 2.46 mm	Synthetic	5000	/	20	1.5	/	0.52902	2.85522	/	/	/
203	ED			Inter-membrane distance = 2.46 mm	Synthetic	5000	/	25	1.5	/	0.5568	4.49832	/	/	/
204	ED			Inter-membrane distance = 2.46 mm	Synthetic	5000	/	30	1.5	/	0.682	5.3064	/	/	/
205	ED			Inter-membrane distance = 2.46 mm	Synthetic	5000	/	35	1.5	/	0.752	6.97643	/	/	/
206	ED	56	Synergistic ammonia recovery from high-ammonia anaerobic digestate via coupled bipolar electrodialysis and membrane contactor system	sweep gas flow rate = 0.5 L/min, vacuum pressure =900 bar	Synthetic	10000	/	6	6	20	/	/	0.531	51.1	/	BPM-ED	Membrane contractor	Membrane contractor
207	ED			sweep gas flow rate = 1 L/min, vacuum pressure =900 bar		10000	/	6	6	20	/	/	0.675	58.5	/
208	ED			sweep gas flow rate = 2 L/min, vacuum pressure =900 bar		10000	/	6	6	20	/	/	0.809	77.4	/
209	ED			sweep gas flow rate = 0.5 L/min, vacuum pressure =900 bar		10000	/	6	6	20	/	/	0.8	124.933	/
210	ED			sweep gas flow rate = 1 L/min, vacuum pressure =900 bar		10000	/	6	6	20	/	/	0.8	66.806	/
211	ED			sweep gas flow rate = 2 L/min, vacuum pressure =900 bar		10000	/	6	6	20	/	/	0.8	83.014	/
212	ED			sweep gas flow rate = 0.5 L/min, vacuum pressure =700 bar		10000	/	6	6	20	/	/	0.337	72.5	/
213	ED			sweep gas flow rate = 1 L/min, vacuum pressure =700 bar		10000	/	6	6	20	/	/	0.485	59.5	/
214	ED			sweep gas flow rate = 2 L/min, vacuum pressure =700 bar		10000	/	6	6	20	/	/	0.668	54.2	/
215	ED			sweep gas flow rate = 0.5 L/min, vacuum pressure =700 bar		10000	/	6	6	20	/	/	0.8	144.881	/
216	ED			sweep gas flow rate = 1 L/min, vacuum pressure =700 bar		10000	/	6	6	20	/	/	0.8	97.038	/
217	ED			sweep gas flow rate = 2 L/min, vacuum pressure =700 bar		10000	/	6	6	20	/	/	0.8	55.277	/
218	ED			sweep gas flow rate = 0.5 L/min, vacuum pressure =500 bar		10000	/	6	6	20	/	/	0.288	74.6	/
219	ED			sweep gas flow rate = 1 L/min, vacuum pressure =500 bar		10000	/	6	6	20	/	/	0.374	80.2	/
220	ED			sweep gas flow rate = 2 L/min, vacuum pressure =500 bar		10000	/	6	6	20	/	/	0.809	76.7	/
221	ED			sweep gas flow rate = 0.5 L/min, vacuum pressure =500 bar		10000	/	6	6	20	/	/	0.8	144.258	/
222	ED			sweep gas flow rate = 1 L/min, vacuum pressure =500 bar		10000	/	6	6	20	/	/	0.8	127.583	/
223	ED			sweep gas flow rate = 2 L/min, vacuum pressure =500 bar		10000	/	6	6	20	/	/	0.8	99.845	/
224	ED	57	Sustainable ammonia recovery from low strength wastewater by the integrated ion exchange and bipolar membrane electrodialysis with membrane contactor system	/	Synthetic	50	0.5	/	24	/	/	/	0.091	11.823	134.564	BPM+CEM+AEM	Membrane contractor	Membrane contractor
225	ED				Synthetic	50	1	/	24	/	/	/	0.309	8.072	157.047
226	ED				Synthetic	50	1.5	/	24	/	/	/	0.562	8.105	176.51
227	ED				Synthetic	50	2	/	24	/	/	/	0.708	8.474	190.604
228	ED				Synthetic	50	2.5	/	24	/	/	/	0.739	10.986	198.993
229	ED	58	Efficient nitrogen removal and recovery from real digested sewage sludge reject water through electroconcentration	/	Synthetic		35	/	2.2	22	0.972179	91	0.876			AEM+CEM	Striping+Absorption column or tank	Striping+Absorption column or tank
230	ED				Real reject water	983	35	/	2.2	22	0.799029	71	0.741
type	indext	No.	Title	Special condition	Wastewater Type	TAN(mg/L)	Current Density(A/m2) (constant or peak)	Constant voltage(V) (constant or peak)	Time(h)	Temperature(℃)	Ammonia removal efficiency (EC)/migration efficiency(EC)	Ammonia removal SEC(kwh/kg N)	Ammonia recovery efficiency（stripper）	Ammonia recovery SEC(kwh/kg N)	Ammonia recovery rate/nitrogen flux (g N/m2/d) EC	Electrochemical cell configuration	Stripping unit type	Classification
1	Other	59	Donnan Dialysis-Osmotic Distillation (DD-OD) Hybrid Process for Selective Ammonium Recovery Driven by Waste Alkali	/	Synthetic	70	0	/	/	/	0.95	8.38	/	/	/	Donnan	Membrane contractor	Membrane contractor
2	Other					700	0	/	/	/	0.97	2.06	/	/	/
3	Other	60	Efficient ammonia recovery from wastewater using electrically conducting gas stripping membranes	CNT coated membrane	Synthetic	/	4.7	/	6	/	0.35	3.66	0.2275	7	/	CEM+ECM	Acid trap+Vacuum stripping	Vacuum stripping
4	Other			Ni membrane		/	24.5	/	24	/	0.74	5.28	0.1554	20.45	/
5	Other	61	Simple and Low-Cost Electroactive Membranes for Ammonia Recovery	/	Synthetic	140.933	15.6	/	1	/	0.0148718	/	0.0117472	22.24	/	ECM	Acid trap tank	Acid trap tank
6	Other					140.933	31.3	/	1	/	0.025	/	0.01642	44.02	/
7	Other					140.933	46.9	/	1	/	0.0312564	/	0.0174786	64.99	/
8	Other					140.933	62.5	/	1	/	0.039	/	0.0258531	69.78	/
9	Other	62	Sustainable ammonia recovery in electrochemical membranes: The critical role of electromigration	/	Synthetic	60	1	/		/	/	/	0.88	2	/	AEM+ECM	Acid trap tank	Acid trap tank
10	Other	63	A novel electrocoagulation-membrane stripping hybrid system for simultaneous ammonia recovery and contaminant removal	/	Synthetic	300	40	/	1	/	/	/	0.686	5.87	1.13	ECM	Membrane contractor	Membrane contractor
11	Other				Synthetic	300	40	/	1	/	/	/	0.686	7.93	1.5

## Sheet: SEC summary for NS
No.	Title	Reactor type	General condition				Special Condition			Energy consumption(removal)	Energy consumption(recovery)	Ammonia removal efficiency	Ammonia recovery efficiency
			Initial TAN(mg/L)	pH	Temperature	Air flow
1	Investigation of ammonia stripping with a hydrodynamic cavitation reactor	Dydrodynamic cavitation reactor	2500	11	60	25 L/min	Cavitation number=0.12	Water circulation flow (L/min)=85	Pressure (bar)=7.4	1.05	/	0.9928	/
2	Removal of ammonia nitrogen in wastewater by microwave radiation: A pilot-scale study	Microwave radiation reactor	2 400 - 11 000	11	90	/	/	/	/	35.5 kwh/m3/h	/	60%-80%	/
3	Repeatedly using the decomposition product of struvite by ultrasound stripping to remove ammonia nitrogen from landfill leachate	Ultrasonic stripping	1395	/	35-65	6 L/min	sonication power = 200W	/	/	12.6897	/	0.9	/
4	Efficient treatment of aged landfill leachate containing high ammonia nitrogen concentration using dynamic wave stripping: Insights into influencing factors and kinetic mechanism	Dynamic wave stripping	610	11	25	12400	Stripping time = 3 h	/	/	11.82	/	0.8745	/
			582	11	25	25800	Stripping time = 3 h	/	/	25.19	/	0.8904	/
			590	11	25	32600	Stripping time = 3 h	/	/	30	/	0.9131	/
			601	11	20	25800	Stripping time = 3 h	/	/	24.81	/	0.878	/
			551	11	30	25800	Stripping time = 3 h	/	/	25.54	/	0.9306	/

## Sheet: SEC summary for TAS
		No.	Title		Basic information				Operation condition						Performance		Energy consumption
Classification	Indext			Published year	Device type	Scale	Operation mode	Wastewater type	Initial TAN (mg/L)	Gas type	Gas flow rate	Time (h)	pH	Temperature(℃)	Ammonia removal efficiency	Ammonia recovery efficiency	Air pump energy consumption (kWh/Kg N)	Energy for other part(liquid pump/chemical pump/stirrer)(kWh/Kg N)	Heating for stripping (kWh/Kg N)	Total for stripping (SEC) (kWh/Kg N)	Total for stripping (kWh/kgN)
TAS	1	1	Nitrogen recovery from intensive livestock farms using a simplified ammonia stripping process	2024	Traditional stripping reactor	Pilot	Batch	Pig slurry	2970	Air	/	360	7.8	36.8	0.5	/	2.04	/	3.04	5.08	/
TAS	2					Pilot	Batch	Dairy cattle slurry	930	Air	/	744	7.7	36.1	0.63	/	10.21	/	58.31	68.52	/
TAS	3	2	Nitrogen and Phosphorus Recovery from Human Urine by Struvite Precipitation and Air Stripping in Vietnam	2011	Packed Columns	Pilot	Batch	human urine after Struvite precipitation		Air	130 m3/h	5	10	40	0.91	0.76	/	/	/	9.5	/
TAS	4					Pilot	Batch	human urine after Struvite precipitation		Air	130 m3/h	0.75	10	40	0.665	0.37	/	/	/	2.5	/
TAS	5					Pilot	Batch	human urine after Struvite precipitation		Air	130m3/h	3.5	10	40	0.9377	1	/	/	/	5	/
TAS	6	3	Air stripping process for ammonia recovery from source-separated urine: modeling and optimization	2014	Traditional stripping tower	lab	Batch	hydrolyzed human urine(after removing the Mg/P)	3810	Air	2 L/min/L urine	3	10	29.85	0.835	0.75	/	/	69.7844	69.7844	/
TAS	7					lab	Batch	hydrolyzed human urine(after removing the Mg/P)	3810	Air	2 L/min/L urine	3	10	39.85	0.937	0.885	/	/	104.98	104.98	/
TAS	8					lab	Batch	hydrolyzed human urine(after removing the Mg/P)	3810	Air	2 L/min/L urine	3	10	49.85	0.97	0.882	/	/	149.958	149.958	/
TAS	9					lab	Batch	hydrolyzed human urine(after removing the Mg/P)	3810	Air	2 L/min/L urine	3	10	59.85	0.996	0.903	/	/	252.164	252.164	/
TAS	10	4	Life cycle assessment and techno-economic analysis of nitrogen recovery by ammonia air-stripping from wastewater treatment	2023	Columns (based on figures)	Full	Continuous sidestream	Municipal wastewater	625	Air	/	/	/	65 ~ 70	0.9152	/	0.256	/	0.336	0.592	/
TAS	11					Full		Municipal wastewater	1437	Air	/	/	/	/	0.800278	/	0.111	/	0.146	0.257	/
TAS	12					Full		Municipal wastewater	535	Air	/	/	/	/	0.8	/	0.299	/	0.392	0.691	/
TAS	13					Full		Municipal wastewater	700	Air	/	/	/	/	0.8	/	0.299	/	0.3	0.599	/
TAS	14					Full		Municipal wastewater	886	Air	/	/	/	/	0.800226	/	0.181	/	0.237	0.418	/
TAS	15					Full		Municipal wastewater	950	Air	/	/	/	/	0.8	/	0.169	/	0.221	0.39	/
TAS	16					Full		Municipal wastewater	1038	Air	/	/	/	/	0.799615	/	0.154	/	0.202	0.356	/
TAS	17	5	Direct nitrogen stripping and upcycling from anaerobic digestate during conversion of cheese whey into single cell protein	2022	Traditional stripping tower	Lab	Batch	liquid digestate	/	Air	0,7-1,3 vvm for 2 A:D ratio (vvm)	24	9,02 ± 0,01	30	0.605	0.875		/		30.8333	30.85
TAS	18	6	Liquid fertilizer products from anaerobic digestion of food waste: mass, nutrient and energy balance of four digestate liquid treatment systems	2016	Traditional stripping column	Pilot (theorical)		theoretical mesophilic digestate liquid		/	/		9-10,20	80	0.948598	0.948598		/		203	203
TAS	19	7	Continuous production of high-concentrated ammonia broth through fermentation	2024	Column up-flow reactor	Lab	Batch	Mesophilic digestate sludge	3800	Air	1,0 L/L/min	1	11	40	0.3684	/	0.0257937	/	2.48016	2.47	/
TAS	20					Lab	Batch	Mesophilic digestate sludge	6700	Air	1,0 L/L/min	1	11	40	0.403	/	0.0133745	/	1.28601	1.28	/
TAS	21					Lab	Batch	Mesophilic digestate sludge	12000	Air	1,0 L/L/min	1	11	40	0.3917	/	0.00768322	/	0.738771	0.75	/
TAS	22					Lab	Batch	Mesophilic digestate sludge	3800	Air	1,0 L/L/min	1	11	60	0.5526	/	0.0171958	/	12.7116	12.73	/
TAS	23					Lab	Batch	Mesophilic digestate sludge	6700	Air	1,0 L/L/min	1	11	60	0.5821	/	0.00925926	/	6.84473	6.84	/
TAS	24					Lab	Batch	Mesophilic digestate sludge	12000	Air	1,0 L/L/min	1	11	60	0.5583	/	0.00538972	/	3.98425	3.97	/
TAS	25					Lab	Batch	Mesophilic digestate sludge	3800	Air	1,0 L/L/min	1	11	80	0.7632	/	0.0124521	/	17.2126	17.22	/
TAS	26					Lab	Batch	Mesophilic digestate sludge	6700	Air	1,0 L/L/min	1	11	80	0.7761	/	0.00694444	/	9.59936	9.62	/
TAS	27					Lab	Batch	Mesophilic digestate sludge	12000	Air	1,0 L/L/min	1	11	80	0.7417	/	0.00405743	/	5.60861	5.61	/
TAS	28	8	Enhancing swine manure treatment: A full-scale techno-economic assessment of nitrogen recovery, pure oxygen aeration and effluent polishing	2024	Stripping column	Full	Continuous,3a	Pig urine		Air	1440 m3/h	/	8.5	50	0.562874	/	0.691489	/	0.904255	1.59574	6.4 - 13.6
TAS	29					Full	Continuous,3b	Pig urine							0.568365	/	0.744681	/	0.904255	1.64894	6.4 - 13.6
TAS	30	9	Evaluation of a new approach for swine wastewater valorisation and treatment: A combined system of ammonium recovery and aerated constructed wetland	2024	Stripping column	Pilot	Batch	Swine LF digestate and LF manure, usually in a ratio of 1:1.	3234	Air	/	1	8.5	25		0.32			0	12.7
TAS	31	10	Environmental and Economic Impacts of Managing Nutrients in Digestate Derived from Sewage Sludge and High-Strength Organic Waste	2022	Traditional stripping tower	Full	Continuous	Sewage sludge (with HSOW =high-strength organic waste)	21.63-23.81	Air	/		11	25	0.928	0.93			0	2.95
TAS	32	11	Recovery of Clean Water and Ammonia from Domestic Wastewater: Impacts on Embodied Energy and Greenhouse Gas Emissions	2022	Traditional stripping tower	Pilot	Continuous	Conventional domestic wastewater	/	/	/	/	10	20	0.95	0.95	15.9906	0.140351	0	15.9906	14.2
TAS	33					Pilot	Continuous	Conventional domestic wastewater	/	/	/	/	10	25	0.95	0.95	9.16959	0.140351	9.4269	18.8912	16.8
TAS	34					Pilot	Continuous	Conventional domestic wastewater	/	/	/	/	10	28	0.95	0.95	6.83041	0.140351	15.4386	22.4094	19.9
TAS	35					Pilot	Continuous	Conventional domestic wastewater	/	/	/	/	10	30	0.95	0.95	5.03392	0.140351	19.4854	25.1181	22.3
TAS	36					Pilot	Continuous	Conventional domestic wastewater	/	/	/	/	10	35	0.95	0.95	2.94269	0.140351	28.786	33.2585	29.6
TAS	37					Pilot	Continuous	Conventional domestic wastewater	/	/	/	/	10	40	0.95	0.95	1.61871	0.140351	39.1018	42.0444	37.4
TAS	38					Pilot	Continuous	Conventional domestic wastewater	/	/	/	/	10	45	0.95	0.95	1.06667	0.140351	50.0585	51.5977	45.9
TAS	39					Pilot	Continuous	Conventional domestic wastewater	/	/	/	/	10	50	0.95	0.95	0.898246	0.140351	59.2281	60.3789	53.7
TAS	40	12	Nitrogen and Phosphorus Harvesting from Human Urine Using a Stripping, Absorption, and Precipitation Process	2017		Lab	Batch	Pure Urine, pH Not Maintained	4500							0.933333	0.330688	/	/	0.330688	/
TAS	41	13	Nitrogen removal from digester supernatant - comparison of chemical and biological methods	1996	Traditional stripping column	Pilot	Continuous	/	/	Air	/	/	10 ~ 12	10 ~ 22	0.95	/	/	/	/	7.36842	/

## Sheet: SEC summary for VAS
Index		No.	Title	Initial TAN(mg/L)	Liquid volume	Liquid flow rate	Gas type	Vacuum pump pressure	vacuum pressure (bar)	Time (h)	pH	Temperature(℃)	Residence TAN	Ammonia removel efficiency	Ammonia recovery efficiency	Vacuum pump	Heating	Stirring	Energy consumption(removal)	Energy consumption(recovery)
VS	1	1	Prediction and optimization of the efficiency and energy consumption of an ammonia vacuum thermal stripping process using experiments and machine learning models	2396.4	3L	Static	No gas input	11.3 kPa	0.113	4.25	9.5	35	N/A	0.9	/	2.95			455.931	/
VS	2			2396.4	3L	Static	No gas input	11.3 kPa	0.113	2.77467	9.5	40	N/A	0.9	/	1.5			231.829	/
VS	3			2396.4	3L	Static	No gas input	11.3 kPa	0.113	1.93333	9.5	45	N/A	0.9	/	1.27			196.282	/
VS	4			2396.4	3L	Static	No gas input	11.3 kPa	0.113	2.07867	10.5	35	N/A	0.9	/	1.1			170.008	/
VS	5			2396.4	3L	Static	No gas input	11.3 kPa	0.113	1.43767	10.5	40	N/A	0.9	/	0.82			126.733	/
VS	6			2396.4	3L	Static	No gas input	11.3 kPa	0.113	1.03467	10.5	45	N/A	0.9	/	0.73			112.824	/
VS	7			2396.4	3L	Static	No gas input	11.3 kPa	0.113	2.18867	11.5	35	N/A	0.9	/	1.15			177.736	/
VS	8			2396.4	3L	Static	No gas input	11.3 kPa	0.113	0.9	11.5	40	N/A	0.9	/	0.48			74.1854	/
VS	9			2396.4	3L	Static	No gas input	11.3 kPa	0.113	0.933333	11.5	45	N/A	0.9	/	0.59			91.1862	/
VS	10	2	Transitioning through the vapour-liquid equilibrium for low energy thermal stripping of ammonia from wastewater: Enabling transformation of NH3 into a zero-carbon fuel	1500	0.5L	Static	Air	0.25 bar	0.25	0.16	11	65	N/A	0.3763	/	34.53		0	34.53	/
VS	11			1500	0.5L	Static	Air	0.25 bar	0.25	0.4	11	65	N/A	0.617	/	53.1		0	53.1	/
VS	12			1500	0.5L	Static	Air	0.25 bar	0.25	0.7	11	65	N/A	0.7786	/	65.85		0	65.85	/
VS	13			1500	0.5L	Static	Air	0.25 bar	0.25	1.5	11	65	N/A	0.91	/	85.21		0	85.21	/
VS	14			1500	0.5L	Static	Air	0.25 bar	0.25	2.3	11	65	N/A	0.98	/	91		0	91	/
VS	15			1500	0.5L	Static	Air	0.25 bar	0.25	0.14658	11	63	N/A	0.217984	/	2.99		0	2.99	/
VS	16			1500	0.5L	Static	Air	0.25 bar	0.25	0.394137	11	63	N/A	0.363488	/	5.06		0	5.06	/
VS	17			1500	0.5L	Static	Air	0.25 bar	0.25	0.732899	11	63	N/A	0.477929	/	9.54		0	9.54	/
VS	18			1500	0.5L	Static	Air	0.25 bar	0.25	1.49511	11	63	N/A	0.66	/	14.63		0	14.63	/
VS	19			1500	0.5L	Static	Air	0.25 bar	0.25	2.23779	11	63	N/A	0.764033	/	28.94		0	28.94	/
VS	20			1500	0.5L	Static	Air	0.25 bar	0.25	3	11	63	N/A	0.845777	/	33.06		0	33.06	/
VS	21			1500	0.5L	Static	Air	0.25 bar	0.25	3.74267	11	63	N/A	0.898093	/	39.35		0	39.35	/
VS	22			1500	0.5L	Static	Air	0.25 bar	0.25	4.5114	11	63	N/A	0.924251	/	46.13		0	46.13	/
VS	23			1500	0.5L	Static	Air	0.25 bar	0.25	5.24756	11	63	N/A	0.93733	/	54.46		0	54.46	/
VS	24			1500	0.5L	Static	Air	0.25 bar	0.25	6.00326	11	63	N/A	0.950409	/	60.73		0	60.73	/
VS	25			1500	0.5L	Static	Air	0.25 bar	0.25	0.726384	11	61	N/A	0.162398	/	0	0.77	0	0.77	/
VS	26			1500	0.5L	Static	Air	0.25 bar	0.25	1.49511	11	61	N/A	0.229428	/	0	0.93	0	0.93	/
VS	27			1500	0.5L	Static	Air	0.25 bar	0.25	2.23779	11	61	N/A	0.306267	/	0	1.89	0	1.89	/
VS	28			1500	0.5L	Static	Air	0.25 bar	0.25	2.99349	11	61	N/A	0.389646	/	0	1.31	0	1.31	/
VS	29			1500	0.5L	Static	Air	0.25 bar	0.25	3.74919	11	61	N/A	0.459946	/	0	0.95	0	0.95	/
VS	30			1500	0.5L	Static	Air	0.25 bar	0.25	4.49837	11	61	N/A	0.52861	/	0	0.88	0	0.88	/
VS	31			1500	0.5L	Static	Air	0.25 bar	0.25	5.25407	11	61	N/A	0.577657	/	0	1.93	0	1.93	/
VS	32			1500	0.5L	Static	Air	0.25 bar	0.25	6.00977	11	61	N/A	0.616894	/	0	1.98	0	1.98	/
VS	33	3	Transforming wastewater ammonia to carbon free energy: Integrating fuel cell technology with ammonia stripping for direct power production			1000 kg/h	Air	250 ± 5 mbar	0.25	1.5	11	65	0.3 Kg/m3	0.86	/	0.65	43.35		44	/
VS	34	4	Techno-economic assessment at full scale of a biogas refinery plant receiving nitrogen rich feedstock and producing renewable energy and biobased fertilisers		26640	222 t d⁻¹	Air	0.4-0.8 bar			8.5 ± 0.12	90	1725.23	0.6	0.645	3.8 kWhel/kg N	59 kWhth/kg N			62.8
VS	35	5	Stable, high-rate anaerobic digestion through vacuum stripping of digestate											0.966667	0.966276		179.643	0	62.069	62.0941
VS	36	6	Low-Temperature Vacuum Evaporation of Ammonia from Pig Slurry at Laboratory and Pilot-Plant Scale	2200									1.2g/L	0.59	0.15	0.0012 kwh/L		0	3.12712	16.3636
VS	37	7	Efficient nutrient recovery/removal from real source-separated urine by coupling vacuum thermal stripping with activated sludge processes	5193	0.5L	Static	Air	21.3 kPa	0.213	6.04682	7.86916	60	696.436		0.784314	2.43 kWh/m3 urine	28.57 kWh/m3 urine	0		7.75
VS	38	8	Three-stage treatment for nitrogen and phosphorus recovery from human urine: Hydrolysis, precipitation and vacuum stripping	10300											0.926209	3.7 kwh/m3	329kwh/m3	0		24.7204
VS	39	9	Simultaneous ammonia recovery and treatment of sludge digestate using the vacuum stripping and absorption process: Scale-up design and pilot study									65		0.91	/				4.46
VS	40	10	Vacuum evaporation coupled with anaerobic digestion for process intensification and ammonia recovery: Model development, validation and scenario analysis	2726	/	2203 m3/d	No gas input				7.31	35			0.000387986	/	/	/	/	6648.66
VS	41			1342	/	1710 m3/d	No gas input				9.2	35			0.184607	/	/	/	/	36.4599
VS	42			1342	/	1710 m3/d	No gas input				6.8	100			0.104888	/	/	/	/	64.6371
VS	43			1915	/	3246 m3/d	No gas input				7.3	35			0.0273419	/	/	/	/	90.9737
VS	44			1005	/	3246 m3/d	No gas input				9.03	35			0.131229	/	/	/	/	36.1177

## Sheet: SEC for MAS
No.	Title				Operation condition								Removal Performance			Energy consumption
		Pore size	Membrane area	Type of the devices	Initial TAN before stripping	Liquid volume	Liquid flow rate	Gas type	Gas flow rate/areation rates/vacuum pump pressure	Time	reaction pH	Feed Temperature(℃)	Ammonia removel efficiency	Avaerage ammonia flux	Water flux (g/L) & Water evaporation (L/h)	Liquid pump	Air pump/vacuum pump	Heating for stripping	Total for stripping	standard unit
1	Ammonia capture from human urine to harvest liquid N-P compound fertilizer by a submerged hollow fiber membrane contactor: Performance and fertilizer analysis		0.03 m2	HFMC	5464.4	4.36 L	0.0173 L/min	Air	N/A	42	12	25	0.8847	0.16782	0.00088	39.88	0	0	39.88	39.88
2	Ultrahigh-purity ammonia recovery from synthetic coke wastewater via membrane contactor: Overcoming phenolic interference and assessing cost efficiency	0.45 μm	2 cm2	Flat-sheet MC	1000	N/A	0.1 L/min	Air	40 L/min	6 cycles	N/A	40	0.99	N/A	N/A	0.71		0.8	1.51	1.52525
		0.45 μm	2 cm2	Flat-sheet MC	1000	N/A	0.1 L/min	Air	N/A	7 cycles	N/A	40	>99%	N/A	N/A	0.76		0.85	1.61	1.62626
		0.45 μm	2 cm2	Flat-sheet MC	1000	N/A	0.1 L/min	Air	N/A	8 cycles	N/A	40	>99%	N/A	N/A	0.78		0.89	1.67	1.68687
		0.45 μm	2 cm2	Flat-sheet MC	1000	N/A	0.1 L/min	Air	N/A	9 cycles	N/A	40	>99%	N/A	N/A	0.8		0.95	1.75	1.76768
		0.45 μm	2 cm2	Flat-sheet MC	1000	N/A	0.1 L/min	Air	N/A	10 cycles	N/A	40	>99%	N/A	N/A	0.81		0.95	1.76	1.77778
		0.45 μm	2 cm2	Flat-sheet MC	1000	N/A	0.1 L/min	Air	37.4 L/min	4 cycles	N/A	50	0.99	N/A	N/A	0.419048		1.00095	1.42	1.43434
		0.45 μm	2 cm2	Flat-sheet MC	1000	N/A	0.1 L/min	Air	N/A	5 cycles	N/A	50	>99%	N/A	N/A	0.452381		1.1381	1.59048	1.60654
		0.45 μm	2 cm2	Flat-sheet MC	1000	N/A	0.1 L/min	Air	N/A	5 cycles	N/A	50	>99%	N/A	N/A	0.490476		1.22857	1.71905	1.73641
		0.45 μm	2 cm2	Flat-sheet MC	1000	N/A	0.1 L/min	Air	N/A	7 cycles	N/A	50	>99%	N/A	N/A	0.5		1.31905	1.81905	1.83742
		0.45 μm	2 cm2	Flat-sheet MC	1000	N/A	0.1 L/min	Air	N/A	8 cycles	N/A	50	>99%	N/A	N/A	0.52381		1.38095	1.90476	1.924
		0.45 μm	2 cm2	Flat-sheet MC	1000	N/A	0.1 L/min	Air	N/A	9 cycles	N/A	50	>99%	N/A	N/A	0.542857		1.4381	1.98095	2.00096
		0.45 μm	2 cm2	Flat-sheet MC	1000	N/A	0.1 L/min	Air	N/A	10 cycles	N/A	50	>99%	N/A	N/A	0.542857		1.44286	1.98571	2.00577
		0.45 μm	2 cm2	Flat-sheet MC	1000	N/A	0.1 L/min	Air	40 L/min	2 cycles	N/A	60	0.99	N/A	N/A	0.283019		1.23585	1.51887	1.53421
		0.45 μm	2 cm2	Flat-sheet MC	1000	N/A	0.1 L/min	Air	N/A	3 cycles	N/A	60	>99%	N/A	N/A	0.320755		1.49528	1.81604	1.83438
		0.45 μm	2 cm2	Flat-sheet MC	1000	N/A	0.1 L/min	Air	N/A	4 cycles	N/A	60	>99%	N/A	N/A	0.334906		1.76415	2.09906	2.12026
		0.45 μm	2 cm2	Flat-sheet MC	1000	N/A	0.1 L/min	Air	N/A	5 cycles	N/A	60	>99%	N/A	N/A	0.349057		1.95755	2.3066	2.3299
		0.45 μm	2 cm2	Flat-sheet MC	1000	N/A	0.1 L/min	Air	N/A	6 cycles	N/A	60	>99%	N/A	N/A	0.377358		2.08962	2.46698	2.4919
		0.45 μm	2 cm2	Flat-sheet MC	1000	N/A	0.1 L/min	Air	N/A	7 cycles	N/A	60	>99%	N/A	N/A	0.396226		2.20283	2.59906	2.62531
		0.45 μm	2 cm2	Flat-sheet MC	1000	N/A	0.1 L/min	Air	N/A	8 cycles	N/A	60	>99%	N/A	N/A	0.400943		2.32547	2.72642	2.75395
		0.45 μm	2 cm2	Flat-sheet MC	1000	N/A	0.1 L/min	Air	N/A	9 cycles	N/A	60	>99%	N/A	N/A	0.419811		2.39623	2.81604	2.84448
		0.45 μm	2 cm2	Flat-sheet MC	1000	N/A	0.1 L/min	Air	N/A	10 cycles	N/A	60	>99%	N/A	N/A	0.433962		2.39623	2.83019	2.85878
3	Fuelling a solid oxide fuel cell with ammonia recovered from water by vacuum membrane stripping	0.1 μm	34 cm2	Flat-sheet MC	1.265	<1L	0.34-0.68 L/s	Air	1,500 Pa	1.23	10	25	0.262451	0.0905448	10.4456	/	/	/	23.2398	23.2398
				Flat-sheet MC	8.321	<1L	0.34-0.68 L/s	Air	1,500 Pa	0.5	10	25	0.132316	0.374216	7.54792	/	/	/	4.2959	4.2959
				Flat-sheet MC	10.986	<1L	0.34-0.68 L/s	Air	1,500 Pa	1	10	25	0.242581	0.481134	7.87956	/	/	/	3.56915	3.56915
				Flat-sheet MC	16.7335	<1L	0.34-0.68 L/s	Air	1,500 Pa	1	10	25	0.143604	0.537999	7.24281	/	/	/	2.9393	2.9393
				Flat-sheet MC	19.9215	<1L	0.34-0.68 L/s	Air	1,500 Pa	0.5	10	25	0.0524559	0.704898	7.46562	/	/	/	2.40635	2.40635
				Flat-sheet MC	1.437	<1L	0.34-0.68 L/s	Air	1,500 Pa	1.23	10	35	0.586987	0.107937	15.7242	/	/	/	29.1507	29.1507
				Flat-sheet MC	10.8165	<1L	0.34-0.68 L/s	Air	1,500 Pa	0.5	10	35	0.0770582	0.741302	10.2897	/	/	/	2.79395	2.79395
				Flat-sheet MC	13.314	<1L	0.34-0.68 L/s	Air	1,500 Pa	0.5	10	35	0.143383	0.845673	10.4766	/	/	/	2.60015	2.60015
				Flat-sheet MC	13.314	<1L	0.34-0.68 L/s	Air	1,500 Pa	0.5	10	35	0.143383	1.5014	12.2568	/	/	/	1.72805	1.72805
4	Recovering Ammonia as Ammonium Citrate and Ammonium Sulfate from Sludge Digestion Liquors Using Membrane Contactors in a Pilot Plant	0.04 μm	53 m2	HFMC	563.8	5 m3	6000 L·h−1 (approximately 1500 L·h−1 per membrane module)	No	6-12 m3/h/m3H2O	60	10	37	0.884179	N/A	24.7192	/	/	/	16.9	16.9
				HFMC	730.5	5 m3	6000 L·h−1 (approximately 1500 L·h−1 per membrane module)	Air	6-12 m3/h/m3H2O	35	10	37	0.873101	N/A	7.526	/	/	/	16.9	16.9
				HFMC	686.3	5 m3	6000 L·h−1 (approximately 1500 L·h−1 per membrane module)	No	6-12 m3/h/m3H2O	11	9.5	37	0.492205	N/A	15.5396	/	/	/	16.9	16.9
				HFMC	659.6	5 m3	6000 L·h−1 (approximately 1500 L·h−1 per membrane module)	Air	6-12 m3/h/m3H2O	12	10	31	0.850819	N/A	5.6392	/	/	/	16.9	16.9
				HFMC	583	5 m3	6000 L·h−1 (approximately 1500 L·h−1 per membrane module)	No	6-12 m3/h/m3H2O	22	10	37	0.860549	N/A	8.8192	/	/	/	16.9	16.9

## Sheet: Economic summary for TAS
No.	Title	Assumption	OPEX						CAPEX	Product			Profit
			Electric cost	Heating cost	Total for chemicals	Maintenance costs	Others	total OPEX		Amount	Type	Monetary value
1	Nitrogen recovery from intensive livestock farms using a simplified ammonia stripping process	Initial TAN = 2970.0 mg/L Liquid volume = 15010 L Time = 360 h pH = 7.8 Temperature = 36.8 °C Efficiency = 50.0%	0.1392 $/kg removed	/	0.8584 $/kg removed	/	/	1.9256 $ kgN-1 removed	/	/	(NH4)2SO4	/	/
		Initial TAN = 1110.0 mg/L Liquid volume = 7670 L Time = 672 h pH = 7.2 Temperature = 37.1 °C Efficiency = 35.0%	0.1392 $/kg removed	/	0.8584 $/kg removed	/	/	1.9256 $ kgN-1 removed	/	/	(NH4)2SO4	/	/
		Initial TAN = 2220.0 mg/L Liquid volume = 7670 L Time = 672 h pH = 7.8 Temperature = 37.9 °C Efficiency = 67.0%	0.1392 $/kg removed	/	0.8584 $/kg removed	/	/	1.9256 $ kgN-1 removed	/	/	(NH4)2SO4	/	/
		Initial TAN = 2330.0 mg/L Liquid volume = 15120 L Time = 768 h pH = 7.9 Temperature = 40.8 °C Efficiency = 79.0%	0.1392 $/kg removed	/	0.8584 $/kg removed	/	/	1.9256 $ kgN-1 removed	/	/	(NH4)2SO4	/	/
		Initial TAN = 1690.0 mg/L Liquid volume = 7750 L Time = 408 h pH = 8.1 Temperature = 36.2 °C Efficiency = 67.0%	0.1392 $/kg removed	/	0.8584 $/kg removed	/	/	1.9256 $ kgN-1 removed	/	/	(NH4)2SO4	/	/
		Initial TAN = 660.0 mg/L Liquid volume = 7640 L Time = 576 h pH = 7.4 Temperature = 39.1 °C Efficiency = 57.0%	0.1392 $/kg removed	/	0.8584 $/kg removed	/	/	1.9256 $ kgN-1 removed	/	/	(NH4)2SO4	/	/
		Initial TAN = 930.0 mg/L Liquid volume = 6380 L Time = 744 h pH = 7.7 Temperature = 36.1 °C Efficiency = 63.0%	0.1392 $/kg removed	/	0.8584 $/kg removed	/	/	1.9256 $ kgN-1 removed	/	/	(NH4)2SO4	/	/
		Initial TAN = 3770.0 mg/L Liquid volume = 7640 L Time = 360 h pH = 7.9 Temperature = 29.3 °C Efficiency = 25.0%	0.1392 $/kg removed	/	0.8584 $/kg removed	/	/	1.0788 $ kgN-1 removed	/	/	(NH4)2SO4	/	/
		Initial TAN = 1830.0 mg/L Liquid volume = 7640 L Time = 504 h pH = 7.4 Temperature = 29.8 °C Efficiency = -5.0%	0.1392 $/kg removed	/	0.8584 $/kg removed	/	/	1.0788 $ kgN-1 removed	/	/	(NH4)2SO4	/	/
		Initial TAN = 3750.0 mg/L Liquid volume = 7900 L Time = 360 h pH = 10.7 Temperature = 29.9 °C Efficiency = 82.0%	0.1392 $/kg removed	/	0.8584 $/kg removed	/	/	5.1388-9.1988 $kgN-1 removed	/	/	(NH4)2SO4	/	/
		Initial TAN = 1440.0 mg/L Liquid volume = 7900 L Time = 504 h pH = 10.7 Temperature = 20.3 °C Efficiency = 76.0%	0.1392 $/kg removed	/	0.8584 $/kg removed	/	/	5.1388-9.1988 $kgN-1 removed	/	/	(NH4)2SO4	/	/
2	Nitrogen and Phosphorus Recovery from Human Urine by Struvite Precipitation and Air Stripping in Vietnam	/	/	/	/	/	/	/	/	/	/	/	/
3	Air stripping process for ammonia recovery from source-separated urine: modeling and optimization	Initial TAN = 3810 mg/L Liquid volume = 250 L Time = 2.2 h pH = 9.30 Temperature = 22.85 °C	/	/	22,78 $/kg N treated	/	/	/	/	/	(NH4)2SO4	/	/
		Initial TAN = 3810 mg/L Liquid volume = 250 L Time = 2.2 h pH = 9.30 Temperature = 29.85 °C	/	/	21,42 $/kg N treated	/	/	/	/	/	(NH4)2SO4	/	/
		Initial TAN = 3810 mg/L Liquid volume = 250 L Time = 2.2 h pH = 9.30 Temperature = 39.85 °C	/	/	22,08 $/kg N treated	/	/	/	/	/	(NH4)2SO4	/	/
		Initial TAN = 3810 mg/L Liquid volume = 250 L Time = 2.2 h pH = 9.30 Temperature = 49.85 °C	/	/	20,72 $/kg N treated	/	/	/	/	/	(NH4)2SO4	/	/
		Initial TAN = 3810 mg/L Liquid volume = 250 L Time = 2.2 h pH = 9.30 Temperature = 59.85 °C	/	/	21,59 $/kg N treated	/	/	/	/	/	(NH4)2SO4	/	/
		Initial TAN = 3810 mg/L Liquid volume = 250 L Time = 2.2 h pH = 9.30 Temperature = 22.85 °C	/	/	15,58 $/kg N treated	/	/	/	/	/	(NH4)2SO4	/	/
		Initial TAN = 3810 mg/L Liquid volume = 250 L Time = 2.2 h pH = 9.30 Temperature = 29.85 °C	/	/	13,63 $/kg N treated	/	/	/	/	/	(NH4)2SO4	/	/
		Initial TAN = 3810 mg/L Liquid volume = 250 L Time = 2.2 h pH = 9.30 Temperature = 39.85 °C	/	/	13,28 $/kg N treated	/	/	/	/	/	(NH4)2SO4	/	/
		Initial TAN = 3810 mg/L Liquid volume = 250 L Time = 2.2 h pH = 9.30 Temperature = 49.85 °C	/	/	12,54 $/kg N treated	/	/	/	/	/	(NH4)2SO4	/	/
		Initial TAN = 3810 mg/L Liquid volume = 250 L Time = 2.2 h pH = 9.30 Temperature = 59.85 °C	/	/	13,23 $/kg N treated	/	/	/	/	/	(NH4)2SO4	/	/
		Initial TAN = 3810 mg/L Liquid volume = 250 L Time = 2.2 h pH = 9.30 Temperature = 22.85 °C	/	/	10,99 $/kg N treated	/	/	/	/	/	(NH4)2SO4	/	/
		Initial TAN = 3810 mg/L Liquid volume = 250 L Time = 2.2 h pH = 9.30 Temperature = 29.85 °C	/	/	9,10 $/kg N treated	/	/	/	/	/	(NH4)2SO4	/	/
		Initial TAN = 3810 mg/L Liquid volume = 250 L Time = 2.2 h pH = 9.30 Temperature = 39.85 °C	/	/	8,54 $/kg N treated	/	/	/	/	/	(NH4)2SO4	/	/
		Initial TAN = 3810 mg/L Liquid volume = 250 L Time = 2.2 h pH = 9.30 Temperature = 49.85 °C	/	/	8,20 $/kg N treated	/	/	/	/	/	(NH4)2SO4	/	/
		Initial TAN = 3810 mg/L Liquid volume = 250 L Time = 2.2 h pH = 9.30 Temperature = 59.85 °C	/	/	8,82 $/kg N treated	/	/	/	/	/	(NH4)2SO4	/	/
		Initial TAN = 3810 mg/L Liquid volume = 250 L Time = 2.2 h pH = 9.30 Temperature = 22.85 °C	/	/	10,11 $/kg N treated	/	/	/	/	/	(NH4)2SO4	/	/
		Initial TAN = 3810 mg/L Liquid volume = 250 L Time = 2.2 h pH = 9.30 Temperature = 29.85 °C	/	/	7,90 $/kg N treated	/	/	/	/	/	(NH4)2SO4	/	/
		Initial TAN = 3810 mg/L Liquid volume = 250 L Time = 2.2 h pH = 9.30 Temperature = 39.85 °C	/	/	7,17 $/kg N treated	/	/	/	/	/	(NH4)2SO4	/	/
		Initial TAN = 3810 mg/L Liquid volume = 250 L Time = 2.2 h pH = 9.30 Temperature = 49.85 °C	/	/	6,86 $/kg N treated	/	/	/	/	/	(NH4)2SO4	/	/
		Initial TAN = 3810 mg/L Liquid volume = 250 L Time = 2.2 h pH = 9.30 Temperature = 59.85 °C	/	/	7,46 $/kg N treated	/	/	/	/	/	(NH4)2SO4	/	/
		Initial TAN = 3810 mg/L Liquid volume = 250 L Time = 2.2 h pH = 9.30 Temperature = 22.85 °C	/	/	10,89 $/kg N treated	/	/	/	/	/	(NH4)2SO4	/	/
		Initial TAN = 3810 mg/L Liquid volume = 250 L Time = 2.2 h pH = 9.30 Temperature = 29.85 °C	/	/	8,23 $/kg N treated	/	/	/	/	/	(NH4)2SO4	/	/
		Initial TAN = 3810 mg/L Liquid volume = 250 L Time = 2.2 h pH = 9.30 Temperature = 39.85 °C	/	/	6,94 $/kg N treated	/	/	/	/	/	(NH4)2SO4	/	/
		Initial TAN = 3810 mg/L Liquid volume = 250 L Time = 2.2 h pH = 9.30 Temperature = 49.85 °C	/	/	6,45 $/kg N treated	/	/	/	/	/	(NH4)2SO4	/	/
		Initial TAN = 3810 mg/L Liquid volume = 250 L Time = 2.2 h pH = 9.30 Temperature = 59.85 °C	/	/	6,89 $/kg N treated	/	/	/	/	/	(NH4)2SO4	/	/
		Initial TAN = 3810 mg/L Liquid volume = 250 L Time = 2.2 h pH = 9.30 Temperature = 22.85 °C	/	/	12,25 $/kg N treated	/	/	/	/	/	(NH4)2SO4	/	/
		Initial TAN = 3810 mg/L Liquid volume = 250 L Time = 2.2 h pH = 9.30 Temperature = 29.85 °C	/	/	8,80 $/kg N treated	/	/	/	/	/	(NH4)2SO4	/	/
		Initial TAN = 3810 mg/L Liquid volume = 250 L Time = 2.2 h pH = 9.30 Temperature = 39.85 °C	/	/	6,89 $/kg N treated	/	/	/	/	/	(NH4)2SO4	/	/
		Initial TAN = 3810 mg/L Liquid volume = 250 L Time = 2.2 h pH = 9.30 Temperature = 49.85 °C	/	/	6,37 $/kg N treated	/	/	/	/	/	(NH4)2SO4	/	/
		Initial TAN = 3810 mg/L Liquid volume = 250 L Time = 2.2 h pH = 9.30 Temperature = 59.85 °C	/	/	6,68 $/kg N treated	/	/	/	/	/	(NH4)2SO4	/	/
		Initial TAN = 3810 mg/L Liquid volume = 250 L Time = 2.2 h pH = 9.30 Temperature = 22.85 °C	/	/	10,96 $/kg N treated	/	/	/	/	/	(NH4)2SO4	/	/
		Initial TAN = 3810 mg/L Liquid volume = 250 L Time = 2.2 h pH = 9.30 Temperature = 29.85 °C	/	/	7,72 $/kg N treated	/	/	/	/	/	(NH4)2SO4	/	/
		Initial TAN = 3810 mg/L Liquid volume = 250 L Time = 2.2 h pH = 9.30 Temperature = 39.85 °C	/	/	6,12 $/kg N treated	/	/	/	/	/	(NH4)2SO4	/	/
		Initial TAN = 3810 mg/L Liquid volume = 250 L Time = 2.2 h pH = 9.30 Temperature = 49.85 °C	/	/	5,73 $/kg N treated	/	/	/	/	/	(NH4)2SO4	/	/
		Initial TAN = 3810 mg/L Liquid volume = 250 L Time = 2.2 h pH = 9.30 Temperature = 59.85 °C	/	/	6,12 $/kg N treated	/	/	/	/	/	(NH4)2SO4	/	/
		Initial TAN = 3810 mg/L Liquid volume = 250 L Time = 2.2 h pH = 10.00 Temperature = 22.85 °C	/	/	16,39 $/kg N treated	/	/	/	/	/	(NH4)2SO4	/	/
		Initial TAN = 3810 mg/L Liquid volume = 250 L Time = 2.2 h pH = 10.00 Temperature = 29.85 °C	/	/	15,73 $/kg N treated	/	/	/	/	/	(NH4)2SO4	/	/
		Initial TAN = 3810 mg/L Liquid volume = 250 L Time = 2.2 h pH = 10.00 Temperature = 39.85 °C	/	/	16,81 $/kg N treated	/	/	/	/	/	(NH4)2SO4	/	/
		Initial TAN = 3810 mg/L Liquid volume = 250 L Time = 2.2 h pH = 10.00 Temperature = 49.85 °C	/	/	16,09 $/kg N treated	/	/	/	/	/	(NH4)2SO4	/	/
		Initial TAN = 3810 mg/L Liquid volume = 250 L Time = 2.2 h pH = 10.00 Temperature = 59.85 °C	/	/	16,33 $/kg N treated	/	/	/	/	/	(NH4)2SO4	/	/
		Initial TAN = 3810 mg/L Liquid volume = 250 L Time = 2.2 h pH = 10.00 Temperature = 22.85 °C	/	/	11,79 $/kg N treated	/	/	/	/	/	(NH4)2SO4	/	/
		Initial TAN = 3810 mg/L Liquid volume = 250 L Time = 2.2 h pH = 10.00 Temperature = 29.85 °C	/	/	10,80 $/kg N treated	/	/	/	/	/	(NH4)2SO4	/	/
		Initial TAN = 3810 mg/L Liquid volume = 250 L Time = 2.2 h pH = 10.00 Temperature = 39.85 °C	/	/	11,06 $/kg N treated	/	/	/	/	/	(NH4)2SO4	/	/
		Initial TAN = 3810 mg/L Liquid volume = 250 L Time = 2.2 h pH = 10.00 Temperature = 49.85 °C	/	/	10,77 $/kg N treated	/	/	/	/	/	(NH4)2SO4	/	/
		Initial TAN = 3810 mg/L Liquid volume = 250 L Time = 2.2 h pH = 10.00 Temperature = 59.85 °C	/	/	11,22 $/kg N treated	/	/	/	/	/	(NH4)2SO4	/	/
		Initial TAN = 3810 mg/L Liquid volume = 250 L Time = 2.2 h pH = 10.00 Temperature = 22.85 °C	/	/	8,90 $/kg N treated	/	/	/	/	/	(NH4)2SO4	/	/
		Initial TAN = 3810 mg/L Liquid volume = 250 L Time = 2.2 h pH = 10.00 Temperature = 29.85 °C	/	/	7,89 $/kg N treated	/	/	/	/	/	(NH4)2SO4	/	/
		Initial TAN = 3810 mg/L Liquid volume = 250 L Time = 2.2 h pH = 10.00 Temperature = 39.85 °C	/	/	8,00 $/kg N treated	/	/	/	/	/	(NH4)2SO4	/	/
		Initial TAN = 3810 mg/L Liquid volume = 250 L Time = 2.2 h pH = 10.00 Temperature = 49.85 °C	/	/	8,02 $/kg N treated	/	/	/	/	/	(NH4)2SO4	/	/
		Initial TAN = 3810 mg/L Liquid volume = 250 L Time = 2.2 h pH = 10.00 Temperature = 59.85 °C	/	/	8,56 $/kg N treated	/	/	/	/	/	(NH4)2SO4	/	/
		Initial TAN = 3810 mg/L Liquid volume = 250 L Time = 2.2 h pH = 10.00 Temperature = 22.85 °C	/	/	8,35 $/kg N treated	/	/	/	/	/	(NH4)2SO4	/	/
		Initial TAN = 3810 mg/L Liquid volume = 250 L Time = 2.2 h pH = 10.00 Temperature = 29.85 °C	/	/	7,15 $/kg N treated	/	/	/	/	/	(NH4)2SO4	/	/
		Initial TAN = 3810 mg/L Liquid volume = 250 L Time = 2.2 h pH = 10.00 Temperature = 39.85 °C	/	/	7,02 $/kg N treated	/	/	/	/	/	(NH4)2SO4	/	/
		Initial TAN = 3810 mg/L Liquid volume = 250 L Time = 2.2 h pH = 10.00 Temperature = 49.85 °C	/	/	7,13 $/kg N treated	/	/	/	/	/	(NH4)2SO4	/	/
		Initial TAN = 3810 mg/L Liquid volume = 250 L Time = 2.2 h pH = 10.00 Temperature = 59.85 °C	/	/	7,73 $/kg N treated	/	/	/	/	/	(NH4)2SO4	/	/
		Initial TAN = 3810 mg/L Liquid volume = 250 L Time = 2.2 h pH = 10.00 Temperature = 22.85 °C	/	/	8,93 $/kg N treated	/	/	/	/	/	(NH4)2SO4	/	/
		Initial TAN = 3810 mg/L Liquid volume = 250 L Time = 2.2 h pH = 10.00 Temperature = 29.85 °C	/	/	7,46 $/kg N treated	/	/	/	/	/	(NH4)2SO4	/	/
		Initial TAN = 3810 mg/L Liquid volume = 250 L Time = 2.2 h pH = 10.00 Temperature = 39.85 °C	/	/	6,91 $/kg N treated	/	/	/	/	/	(NH4)2SO4	/	/
		Initial TAN = 3810 mg/L Liquid volume = 250 L Time = 2.2 h pH = 10.00 Temperature = 49.85 °C	/	/	6,90 $/kg N treated	/	/	/	/	/	(NH4)2SO4	/	/
		Initial TAN = 3810 mg/L Liquid volume = 250 L Time = 2.2 h pH = 10.00 Temperature = 59.85 °C	/	/	7,40 $/kg N treated	/	/	/	/	/	(NH4)2SO4	/	/
		Initial TAN = 3810 mg/L Liquid volume = 250 L Time = 2.2 h pH = 10.00 Temperature = 22.85 °C	/	/	9,82 $/kg N treated	/	/	/	/	/	(NH4)2SO4	/	/
		Initial TAN = 3810 mg/L Liquid volume = 250 L Time = 2.2 h pH = 10.00 Temperature = 29.85 °C	/	/	7,68 $/kg N treated	/	/	/	/	/	(NH4)2SO4	/	/
		Initial TAN = 3810 mg/L Liquid volume = 250 L Time = 2.2 h pH = 10.00 Temperature = 39.85 °C	/	/	7,04 $/kg N treated	/	/	/	/	/	(NH4)2SO4	/	/
		Initial TAN = 3810 mg/L Liquid volume = 250 L Time = 2.2 h pH = 10.00 Temperature = 49.85 °C	/	/	6,80 $/kg N treated	/	/	/	/	/	(NH4)2SO4	/	/
		Initial TAN = 3810 mg/L Liquid volume = 250 L Time = 2.2 h pH = 10.00 Temperature = 59.85 °C	/	/	7,27 $/kg N treated	/	/	/	/	/	(NH4)2SO4	/	/
		Initial TAN = 3810 mg/L Liquid volume = 250 L Time = 2.2 h pH = 10.00 Temperature = 22.85 °C	/	/	9,00 $/kg N treated	/	/	/	/	/	(NH4)2SO4	/	/
		Initial TAN = 3810 mg/L Liquid volume = 250 L Time = 2.2 h pH = 10.00 Temperature = 29.85 °C	/	/	7,10 $/kg N treated	/	/	/	/	/	(NH4)2SO4	/	/
		Initial TAN = 3810 mg/L Liquid volume = 250 L Time = 2.2 h pH = 10.00 Temperature = 39.85 °C	/	/	6,38 $/kg N treated	/	/	/	/	/	(NH4)2SO4	/	/
4	Life cycle assessment and techno-economic analysis of nitrogen recovery by ammonia air-stripping from wastewater treatment	Initial TAN=625 mg/L, temperature=65-70, Efficiency= 91% In 2020	/	/	/	/	/	$31.3 million	$26.4 million	/	(NH4)2SO4 (100 % w/w)	$0.046 break even selling price	/
5	Direct nitrogen stripping and upcycling from anaerobic digestate during conversion of cheese whey into single cell protein	Liquid volume= 0,5 L, Gas flow rate= 0,7-1,3 vvm 2 A:D ratio (vvm)	/	/	/	/	/	4.93–7.25 $ kg/N	/	/	/	/	/
6	Multi-barrier treatment of mature landfill leachate: effect of Fenton oxidation and air stripping on activated sludge process and cost analysis	Initial TAN=50mg/L Liquid volume=0,1 L Liquid flow= 30 L/h Gas flow= 550L/h Temperature=20	0.174 $/kWh	/	0.696 $/L	/	/	11.09 $/m³ LL	/	/	(NH4)2SO4	0.232 $/L	/
			0.174 $/kWh	/	0.696 $/L	/	/	15.86 $/m³ LL	/	/	(NH4)2SO4	0.232 $/L	/
			0.174 $/kWh	/	0.696 $/L	/	/	19.60 $/m³ LL	/	/	(NH4)2SO4	0.232 $/L	/
			0.174 $/kWh	/	0.696 $/L	/	/	22.69 $/m³ LL	/	/	(NH4)2SO4	0.232 $/L	/
			0.174 $/kWh	/	0.696 $/L	/	/	24.49 $/m³ LL	/	/	(NH4)2SO4	0.232 $/L	/
			0.174 $/kWh	/	0.696 $/L	/	/	26.55 $/m³ LL	/	/	(NH4)2SO4	0.232 $/L	/
			0.174 $/kWh	/	0.696 $/L	/	/	28.09 $/m³ LL	/	/	(NH4)2SO4	0.232 $/L	/
			0.174 $/kWh	/	0.696 $/L	/	/	29.65 $/m³ LL	/	/	(NH4)2SO4	0.232 $/L	/
			0.174 $/kWh	/	0.696 $/L	/	/	31.47 $/m³ LL	/	/	(NH4)2SO4	0.232 $/L	/
			0.174 $/kWh	/	0.696 $/L	/	/	33.00 $/m³ LL	/	/	(NH4)2SO4	0.232 $/L	/
			0.174 $/kWh	/	0.696 $/L	/	/	34.93 $/m³ LL	/	/	(NH4)2SO4	0.232 $/L	/
7	Combined ammonia recovery and solid oxide fuel cell use at wastewater treatment plants for energy and greenhouse gas emission improvements	/	$0.1344/ kW electricity	/	/	/	/	/	/	/	/	/	/
8	Techno-economic analysis of nutrient recovery from urine: Centralized treatment of hydrolyzed urine vs. decentralized treatment of fresh urine	Hydrolyzed urine pH=8.9 TAN=3527.5 mg/L Liquid flow rate=15.3 m3/day time=24h Temperature=60	$0.0533/kWh	/	1.707 $/kg	4 % of CAPEX	3.56% of CAPEX of Land, rent, insurance, labour ( and $0.5/kg of biochar)	303290 CAD/year	2927600 CAD		(NH4)2SO4 K-enriched chabazite Urea-enriched biochar	$0.374/kg $1.69/kg $0.60/kg	62,690 CAD/year 71,520 CAD/year with energy savings
		Fresh urine pH=6.6 TAN=180.6 mg/L Static time=24h Temperature=60	$0.0533/kWh	/	2.207 $/kg	4 % of CAPEX	3.56% of CAPEX of Land, rent, insurance, labour ( and $0.5/kg of biochar)	440000 CAD/year	2278200 CAD		(NH4)2SO4 K-enriched chabazite Urea-enriched biochar	$0.374/kg $1.69/kg $0.60/kg	158,630 CAD/year 170,560 CAD/year with energy savings
9	Techno-economic feasibility study of ammonia recovery from sewage sludge digestate in wastewater treatment plants	feed flow rate of 20,000 kg/hr an air flow rate of 40,000 kg/hr NaOH=150 kg/hr temperature=60 pressure= 1.5 bar pH = 10 NPV over a 15-year project lifespan	564430 $/year	/	277200 $/year	9000 $	/	342630 $/year	300000 $	/	/	/	392,040 USD/year NPV=122,924 USD
10	Enhancing swine manure treatment: A full-scale techno-economic assessment of nitrogen recovery, pure oxygen aeration and effluent polishing	Initial TAN=3655.4 g/kg Liquid flow rate = 7.18 L/h Temperature = 6 °C pH = 8.5 Gas flow rate = 1440 m³/h Efficiency = 67%	/	/	0.3898 $/kg N	/	/	/	/	/	(NH4)2SO4	/	/
		Initial TAN=3273,2 mg/L Liquid flow rate=7.18L/h Temperature=50 pH=8.5 Gas flow rate=1440 m3/h Efficiency=56%	/	0.46284 $/ton	0.232 $/t	/	0.27144 $/ton (for non-heating)	2.088 $ t -1 LF manure or 0.812 $ t -1 raw manure	261000$	/	NH₄NO₃	/	/
11	Evaluation of a new approach for swine wastewater valorisation and treatment: A combined system of ammonium recovery and aerated constructed wetland	Initial TAN=3,3 ± 0,49 g/kg Liquid volume=1020,41L Time=1h Temperature=25 pH=8.5	0.10 € kWh-1	/	232 $/t	1.4% CAPEX	2.5% CAPEX	/	290000 $	27 kg of 21% AN solution/t swine wastewater	NH₄NO₃	754–870 $ t-1 N	/
12	Environmental and Economic Impacts of Managing Nutrients in Digestate Derived from Sewage Sludge and High-Strength Organic Waste	Air Stripping Initial TAN= 4500 kg/day Liquid flow rate= 189000–208000 m³/d Temperature=25 pH=11 (2020 dollars for all calculations)	$5,45M	Negligible	0.24 $/kg	/	/	/	/	/	/	/	NPV=$95M
		Thermal Stripping Initial TAN= 4500 kg/day Liquid flow rate= 189000–208000 m³/d Temperature=70-90 pH=11 (2020 dollars for all calculations)	$5M	$44,1M	0.24 $/kg	/	/	/	/	/	/	/	NPV=$150M
13	Recovery of Clean Water and Ammonia from Domestic Wastewater: Impacts on Embodied Energy and Greenhouse Gas Emissions	/	/	/	/	/	/	/	/	/	/	/	/
14	Transformation of Liquid Digestate from the Solid-Separated Biogas Digestion Reactor Effluent into a Solid NH4HCO3 Fertilizer: Sustainable Process Engineering and Life Cycle Assessment	Liquid flow rate= 30000 L/h Time=9 h pH=7.86 without NaOh pH=9 with NaOH	8,188 $M/y with 0.06 $/kWh	/	30 $/tonne	/	low pressure steam 7.78 $/GJ cooling water 0.354 $/GJ defoaming agent 3000 $/tonne	/	8,199 $M	/	(NH4)2SO4	250 $/tonne	/
15	Nutrient removal from digested swine wastewater by combining ammonia stripping with struvite precipitation	Initial TAN=297.60 ± 2.39 mg/L Liquid volume=1L Gas flow rate=0.48 m3 h−1 L−1 Time=3h Temperature=40 pH=changing	7.92 $ kg−1 NH4 +-Nremoved with 0.1 $ kw−1 h−1 market price	/	/	/	/	9.44 $ kg−1 NH4 +Nremoved	/	N7A	Struvite	4.5 $ kg−1 NH4 +-Nremoved	4.94 $ kg−1 NH4 +-Nremoved (final cost after profit )
16	Simultaneous regeneration of exhausted zeolite and nitrogen recovery using an air stripping method at alkaline pH	feed flow rate=10,000 m3/d Initial TAN= 30 mg/L RE of exhausted zeolite= 85%	2125 $/year with $0.13–0.18/kWhr	/	167400 $/year	/	/	/	/	42 ton	(NH4)2SO4	/	/
17	Treatment of High Ammonium–Nitrogen Wastewater from Composting Facilities by Air Stripping and Catalytic Oxidation	Heating with oil (per kg NH4-N loading) with 0.06EUR/kWh	2.784 $/kg NH4–N loading with 0.0986 $/kWh (same for every row)	1.972 $/kg NH4–N loading	1.508 $/kg NH4–N or 104.4 $/batch	/	/	$ 1.856–3.48/kg N removed	$ 145000 or $ 0.464/kg N	/	/	/	/
		Heating oil (batch)	194.88 $/batch	138.04 $/batch		/	/			/	/	/	/
		Heating with biogas (per kg NH4-N loading) with 0.012 EUR/kWh	2.784 $/kg NH4–N loading	0.348 $/kg NH4–N loading		/	/			/	/	/	/
		Heating with biogas( batch)	194.88 $/batch	23.2 $/batch		/	/			/	/	/	/
		Total (per kg NH4-N loading) Heating with oil	4.292 $/kg NH4–N loading	3.48 $/kg NH4–N loading		/	/			/	/	/	/
		Total (batch) Heating with oil		242.44 $/batch		/	/			/	/	/	/
		Total (per kg NH4-N loading) Heating biogas	299.28 $/batch	1.856 $/kg NH4–N loading		/	/			/	/	/	/
		Total (batch) Heating biogas		127.6 $/batch		/	/			/	/	/	/
		Operational costs (heating oil)	7.4 EUR/m3 wastewater	6.0 EUR/m3 wastewater	/	/	/			/	/	/	/
		Operational costs (heating with biogas)		3.1 EUR/m3 wastewater	/	/	/			/	/	/	/
18	Ammonia stripping from MSW landfill leachate in bubble reactors: process modeling and optimization	1 US$ =1 700 Lit. (Italian Lire) Liquid flow rate = 4167 L/h Time = 200 day/year Gas flow rate = 45 Nm³/h Temperature = 30 pH = 9 N.C. Removal efficiency = 30% 1 US$= 1 700 Lit. (Italian Lire)	0.0888–0.217 $/m³ leachate with 0.106 $/kWh for electricity	/	0.253–0.765 $/m³ leachate	/	For blowers: 0.038–2.29 $/m³ leachate	4.23 $/m³ leachate	0.88 $/m³ leachate	/	(NH4)2SO4	/	/
		Liquid flow rate = 4167 L/h Time = 200 day/year Gas flow rate = 70 Nm³/h Temperature = 30 pH = 9 N.C. Removal efficiency = 30% 1 US$= 1 700 Lit. (Italian Lire)	0.0888–0.217 $/m³ leachate with 0.106 $/kWh for electricity	/	0.253–0.765 $/m³ leachate	/	For blowers: 0.038–2.29 $/m³ leachate	4.23 $/m³ leachate	0.82 $/m³ leachate	/	(NH4)2SO4	/	/
		Liquid flow rate = 4167 L/h Time = 200 day/year Gas flow rate = 45 Nm³/h Temperature = 30 pH = 11 Removal efficiency = 30% 1 US$= 1 700 Lit. (Italian Lire)	0.0888–0.217 $/m³ leachate with 0.106 $/kWh for electricity	/	0.253–0.765 $/m³ leachate	/	For blowers: 0.038–2.29 $/m³ leachate	4.35 $/m³ leachate	0.41 $/m³ leachate	/	(NH4)2SO4	/	/
		Liquid flow rate = 4167 L/h Time = 200 day/year Gas flow rate = 70 Nm³/h Temperature = 30 pH = 11 Removal efficiency = 30% 1 US$= 1 700 Lit. (Italian Lire)	0.0888–0.217 $/m³ leachate with 0.106 $/kWh for electricity	/	0.253–0.765 $/m³ leachate	/	For blowers: 0.038–2.29 $/m³ leachate	4.29 $/m³ leachate	0.35 $/m³ leachate	/	(NH4)2SO4	/	/
		Liquid flow rate = 4167 L/h Time = 200 day/year Gas flow rate = 45 Nm³/h Temperature = 50 pH = 9 N.C. Removal efficiency = 30% 1 US$= 1 700 Lit. (Italian Lire)	0.0888–0.217 $/m³ leachate with 0.106 $/kWh for electricity	/	0.253–0.765 $/m³ leachate	/	For blowers: 0.038–2.29 $/m³ leachate	2.47 $/m³ leachate	0.24 $/m³ leachate	/	(NH4)2SO4	/	/
		Liquid flow rate = 4167 L/h Time = 200 day/year Gas flow rate = 70 Nm³/h Temperature = 50 pH = 9 N.C. Removal efficiency = 30% 1 US$= 1 700 Lit. (Italian Lire)	0.0888–0.217 $/m³ leachate with 0.106 $/kWh for electricity	/	0.253–0.765 $/m³ leachate	/	For blowers: 0.038–2.29 $/m³ leachate	2.53 $/m³ leachate	0.29 $/m³ leachate	/	(NH4)2SO4	/	/
		Liquid flow rate = 4167 L/h Time = 200 day/year Gas flow rate = 45 Nm³/h Temperature = 50 pH = 11 Removal efficiency = 30% 1 US$= 1 700 Lit. (Italian Lire)	0.0888–0.217 $/m³ leachate with 0.106 $/kWh for electricity	/	0.253–0.765 $/m³ leachate	/	For blowers: 0.038–2.29 $/m³ leachate	5.00 $/m³ leachate	0.29 $/m³ leachate	/	(NH4)2SO4	/	/
		Liquid flow rate = 4167 L/h Time = 200 day/year Gas flow rate = 70 Nm³/h Temperature = 50 pH = 11 Removal efficiency = 30% 1 US$= 1 700 Lit. (Italian Lire)	0.0888–0.217 $/m³ leachate with 0.106 $/kWh for electricity	/	0.253–0.765 $/m³ leachate	/	For blowers: 0.038–2.29 $/m³ leachate	4.88 $/m³ leachate	0.29 $/m³ leachate	/	(NH4)2SO4	/	/
		Liquid flow rate = 4167 L/h Time = 200 day/year Gas flow rate = 45 Nm³/h Temperature = 70 pH = 9 N.C. Removal efficiency = 30% 1 US$= 1 700 Lit. (Italian Lire)	0.0888–0.217 $/m³ leachate with 0.106 $/kWh for electricity	/	0.253–0.765 $/m³ leachate	/	For blowers: 0.038–2.29 $/m³ leachate	2.59 $/m³ leachate	0.24 $/m³ leachate	/	(NH4)2SO4	/	/
		Liquid flow rate = 4167 L/h Time = 200 day/year Gas flow rate = 70 Nm³/h Temperature = 70 pH = 9 N.C. Removal efficiency = 30% 1 US$= 1 700 Lit. (Italian Lire)	0.0888–0.217 $/m³ leachate with 0.106 $/kWh for electricity	/	0.253–0.765 $/m³ leachate	/	For blowers: 0.038–2.29 $/m³ leachate	2.35 $/m³ leachate	0.24 $/m³ leachate	/	(NH4)2SO4	/	/
		Liquid flow rate = 4167 L/h Time = 200 day/year Gas flow rate = 45 Nm³/h Temperature = 70 pH = 11 Removal efficiency = 30% 1 US$= 1 700 Lit. (Italian Lire)	0.0888–0.217 $/m³ leachate with 0.106 $/kWh for electricity	/	0.253–0.765 $/m³ leachate	/	For blowers: 0.038–2.29 $/m³ leachate	5.94 $/m³ leachate	0.29 $/m³ leachate	/	(NH4)2SO4	/	/
		Liquid flow rate = 4167 L/h Time = 200 day/year Gas flow rate = 70 Nm³/h Temperature = 70 pH = 11 Removal efficiency = 30% 1 US$= 1 700 Lit. (Italian Lire)	0.0888–0.217 $/m³ leachate with 0.106 $/kWh for electricity	/	0.253–0.765 $/m³ leachate	/	For blowers: 0.038–2.29 $/m³ leachate	5.59 $/m³ leachate	0.29 $/m³ leachate	/	(NH4)2SO4	/	/
		Liquid flow rate = 4167 L/h Time = 200 day/year Gas flow rate = 45 Nm³/h Temperature = 30 pH = 9 N.C. Removal efficiency = 50% 1 US$= 1 700 Lit. (Italian Lire)	0.0888–0.217 $/m³ leachate with 0.106 $/kWh for electricity	/	0.253–0.765 $/m³ leachate	/	For blowers: 0.038–2.29 $/m³ leachate	7.23 $/m³ leachate	1.47 $/m³ leachate	/	(NH4)2SO4	/	/
		Liquid flow rate = 4167 L/h Time = 200 day/year Gas flow rate = 70 Nm³/h Temperature = 30 pH = 9 N.C. Removal efficiency = 50% 1 US$= 1 700 Lit. (Italian Lire)	0.0888–0.217 $/m³ leachate with 0.106 $/kWh for electricity	/	0.253–0.765 $/m³ leachate	/	For blowers: 0.038–2.29 $/m³ leachate	7.12 $/m³ leachate	1.24 $/m³ leachate	/	(NH4)2SO4	/	/
		Liquid flow rate = 4167 L/h Time = 200 day/year Gas flow rate = 45 Nm³/h Temperature = 30 pH = 11 Removal efficiency = 50% 1 US$= 1 700 Lit. (Italian Lire)	0.0888–0.217 $/m³ leachate with 0.106 $/kWh for electricity	/	0.253–0.765 $/m³ leachate	/	For blowers: 0.038–2.29 $/m³ leachate	5.41 $/m³ leachate	0.59 $/m³ leachate	/	(NH4)2SO4	/	/
		Liquid flow rate = 4167 L/h Time = 200 day/year Gas flow rate = 70 Nm³/h Temperature = 30 pH = 11 Removal efficiency = 50% 1 US$= 1 700 Lit. (Italian Lire)	0.0888–0.217 $/m³ leachate with 0.106 $/kWh for electricity	/	0.253–0.765 $/m³ leachate	/	For blowers: 0.038–2.29 $/m³ leachate	5.41 $/m³ leachate	0.53 $/m³ leachate	/	(NH4)2SO4	/	/
		Liquid flow rate = 4167 L/h Time = 200 day/year Gas flow rate = 45 Nm³/h Temperature = 50 pH = 9 N.C. Removal efficiency = 50% 1 US$= 1 700 Lit. (Italian Lire)	0.0888–0.217 $/m³ leachate with 0.106 $/kWh for electricity	/	0.253–0.765 $/m³ leachate	/	For blowers: 0.038–2.29 $/m³ leachate	3.88 $/m³ leachate	0.47 $/m³ leachate	/	(NH4)2SO4	/	/
		Liquid flow rate = 4167 L/h Time = 200 day/year Gas flow rate = 70 Nm³/h Temperature = 50 pH = 9 N.C. Removal efficiency = 50% 1 US$= 1 700 Lit. (Italian Lire)	0.0888–0.217 $/m³ leachate with 0.106 $/kWh for electricity	/	0.253–0.765 $/m³ leachate	/	For blowers: 0.038–2.29 $/m³ leachate	3.94 $/m³ leachate	0.41 $/m³ leachate	/	(NH4)2SO4	/	/
		Liquid flow rate = 4167 L/h Time = 200 day/year Gas flow rate = 45 Nm³/h Temperature = 50 pH = 11 Removal efficiency = 50% 1 US$= 1 700 Lit. (Italian Lire)	0.0888–0.217 $/m³ leachate with 0.106 $/kWh for electricity	/	0.253–0.765 $/m³ leachate	/	For blowers: 0.038–2.29 $/m³ leachate	5.88 $/m³ leachate	0.41 $/m³ leachate	/	(NH4)2SO4	/	/
		Liquid flow rate = 4167 L/h Time = 200 day/year Gas flow rate = 70 Nm³/h Temperature = 50 pH = 11 Removal efficiency = 50% 1 US$= 1 700 Lit. (Italian Lire)	0.0888–0.217 $/m³ leachate with 0.106 $/kWh for electricity	/	0.253–0.765 $/m³ leachate	/	For blowers: 0.038–2.29 $/m³ leachate	5.70 $/m³ leachate	0.35 $/m³ leachate	/	(NH4)2SO4	/	/
		Liquid flow rate = 4167 L/h Time = 200 day/year Gas flow rate = 45 Nm³/h Temperature = 70 pH = 9 N.C. Removal efficiency = 50% 1 US$= 1 700 Lit. (Italian Lire)	0.0888–0.217 $/m³ leachate with 0.106 $/kWh for electricity	/	0.253–0.765 $/m³ leachate	/	For blowers: 0.038–2.29 $/m³ leachate	3.53 $/m³ leachate	0.24 $/m³ leachate	/	(NH4)2SO4	/	/
		Liquid flow rate = 4167 L/h Time = 200 day/year Gas flow rate = 70 Nm³/h Temperature = 70 pH = 9 N.C. Removal efficiency = 50% 1 US$= 1 700 Lit. (Italian Lire)	0.0888–0.217 $/m³ leachate with 0.106 $/kWh for electricity	/	0.253–0.765 $/m³ leachate	/	For blowers: 0.038–2.29 $/m³ leachate	3.29 $/m³ leachate	0.24 $/m³ leachate	/	(NH4)2SO4	/	/
		Liquid flow rate = 4167 L/h Time = 200 day/year Gas flow rate = 45 Nm³/h Temperature = 70 pH = 11 Removal efficiency = 50% 1 US$= 1 700 Lit. (Italian Lire)	0.0888–0.217 $/m³ leachate with 0.106 $/kWh for electricity	/	0.253–0.765 $/m³ leachate	/	For blowers: 0.038–2.29 $/m³ leachate	6.59 $/m³ leachate	0.29 $/m³ leachate	/	(NH4)2SO4	/	/
		Liquid flow rate = 4167 L/h Time = 200 day/year Gas flow rate = 70 Nm³/h Temperature = 70 pH = 11 Removal efficiency = 50% 1 US$= 1 700 Lit. (Italian Lire)	0.0888–0.217 $/m³ leachate with 0.106 $/kWh for electricity	/	0.253–0.765 $/m³ leachate	/	For blowers: 0.038–2.29 $/m³ leachate	6.47 $/m³ leachate	0.29 $/m³ leachate	/	(NH4)2SO4	/	/
		Liquid flow rate = 4167 L/h Time = 200 day/year Gas flow rate = 45 Nm³/h Temperature = 30 pH = 11 Removal efficiency = 70% 1 US$= 1 700 Lit. (Italian Lire)	0.0888–0.217 $/m³ leachate with 0.106 $/kWh for electricity	/	0.253–0.765 $/m³ leachate	/	For blowers: 0.038–2.29 $/m³ leachate	6.94 $/m³ leachate	0.82 $/m³ leachate	/	(NH4)2SO4	/	/
		Liquid flow rate = 4167 L/h Time = 200 day/year Gas flow rate = 70 Nm³/h Temperature = 30 pH = 11 Removal efficiency = 70% 1 US$= 1 700 Lit. (Italian Lire)	0.0888–0.217 $/m³ leachate with 0.106 $/kWh for electricity	/	0.253–0.765 $/m³ leachate	/	For blowers: 0.038–2.29 $/m³ leachate	6.88 $/m³ leachate	0.71 $/m³ leachate	/	(NH4)2SO4	/	/
		Liquid flow rate = 4167 L/h Time = 200 day/year Gas flow rate = 45 Nm³/h Temperature = 50 pH = 9 N.C. Removal efficiency = 70% 1 US$= 1 700 Lit. (Italian Lire)	0.0888–0.217 $/m³ leachate with 0.106 $/kWh for electricity	/	0.253–0.765 $/m³ leachate	/	For blowers: 0.038–2.29 $/m³ leachate	5.94 $/m³ leachate	0.65 $/m³ leachate	/	(NH4)2SO4	/	/
		Liquid flow rate = 4167 L/h Time = 200 day/year Gas flow rate = 70 Nm³/h Temperature = 50 pH = 9 N.C. Removal efficiency = 70% 1 US$= 1 700 Lit. (Italian Lire)	0.0888–0.217 $/m³ leachate with 0.106 $/kWh for electricity	/	0.253–0.765 $/m³ leachate	/	For blowers: 0.038–2.29 $/m³ leachate	5.88 $/m³ leachate	0.53 $/m³ leachate	/	(NH4)2SO4	/	/
		Liquid flow rate = 4167 L/h Time = 200 day/year Gas flow rate = 45 Nm³/h Temperature = 50 pH = 11 Removal efficiency = 70% 1 US$= 1 700 Lit. (Italian Lire)	0.0888–0.217 $/m³ leachate with 0.106 $/kWh for electricity	/	0.253–0.765 $/m³ leachate	/	For blowers: 0.038–2.29 $/m³ leachate	7.00 $/m³ leachate	0.47 $/m³ leachate	/	(NH4)2SO4	/	/
		Liquid flow rate = 4167 L/h Time = 200 day/year Gas flow rate = 70 Nm³/h Temperature = 50 pH = 11 Removal efficiency = 70% 1 US$= 1 700 Lit. (Italian Lire)	0.0888–0.217 $/m³ leachate with 0.106 $/kWh for electricity	/	0.253–0.765 $/m³ leachate	/	For blowers: 0.038–2.29 $/m³ leachate	6.82 $/m³ leachate	0.47 $/m³ leachate	/	(NH4)2SO4	/	/
		Liquid flow rate = 4167 L/h Time = 200 day/year Gas flow rate = 45 Nm³/h Temperature = 30 pH = 11 Removal efficiency = 90% 1 US$= 1 700 Lit. (Italian Lire)	0.0888–0.217 $/m³ leachate with 0.106 $/kWh for electricity	/	0.253–0.765 $/m³ leachate	/	For blowers: 0.038–2.29 $/m³ leachate	9.17 $/m³ leachate	1.24 $/m³ leachate	/	(NH4)2SO4	/	/
		Liquid flow rate = 4167 L/h Time = 200 day/year Gas flow rate = 70 Nm³/h Temperature = 30 pH = 11 Removal efficiency = 90% 1 US$= 1 700 Lit. (Italian Lire)	0.0888–0.217 $/m³ leachate with 0.106 $/kWh for electricity	/	0.253–0.765 $/m³ leachate	/	For blowers: 0.038–2.29 $/m³ leachate	9.12 $/m³ leachate	1.18 $/m³ leachate	/	(NH4)2SO4	/	/
		Liquid flow rate = 4167 L/h Time = 200 day/year Gas flow rate = 45 Nm³/h Temperature = 50 pH = 9 N.C. Removal efficiency = 90% 1 US$= 1 700 Lit. (Italian Lire)	0.0888–0.217 $/m³ leachate with 0.106 $/kWh for electricity	/	0.253–0.765 $/m³ leachate	/	For blowers: 0.038–2.29 $/m³ leachate	10.29 $/m³ leachate	0.88 $/m³ leachate	/	(NH4)2SO4	/	/
		Liquid flow rate = 4167 L/h Time = 200 day/year Gas flow rate = 70 Nm³/h Temperature = 50 pH = 9 N.C. Removal efficiency = 90% 1 US$= 1 700 Lit. (Italian Lire)	0.0888–0.217 $/m³ leachate with 0.106 $/kWh for electricity	/	0.253–0.765 $/m³ leachate	/	For blowers: 0.038–2.29 $/m³ leachate	10.24 $/m³ leachate	0.76 $/m³ leachate	/	(NH4)2SO4	/	/
		Liquid flow rate = 4167 L/h Time = 200 day/year Gas flow rate = 45 Nm³/h Temperature = 50 pH = 11 Removal efficiency = 90% 1 US$= 1 700 Lit. (Italian Lire)	0.0888–0.217 $/m³ leachate with 0.106 $/kWh for electricity	/	0.253–0.765 $/m³ leachate	/	For blowers: 0.038–2.29 $/m³ leachate	9.65 $/m³ leachate	0.71 $/m³ leachate	/	(NH4)2SO4	/	/
		Liquid flow rate = 4167 L/h Time = 200 day/year Gas flow rate = 70 Nm³/h Temperature = 50 pH = 11 Removal efficiency = 90% 1 US$= 1 700 Lit. (Italian Lire)	0.0888–0.217 $/m³ leachate with 0.106 $/kWh for electricity	/	0.253–0.765 $/m³ leachate	/	For blowers: 0.038–2.29 $/m³ leachate	9.53 $/m³ leachate	0.65 $/m³ leachate	/	(NH4)2SO4	/	/
		Liquid flow rate = 4167 L/h Time = 200 day/year Gas flow rate = 45 Nm³/h Temperature = 70 pH = 9 N.C. Removal efficiency = 90% 1 US$= 1 700 Lit. (Italian Lire)	0.0888–0.217 $/m³ leachate with 0.106 $/kWh for electricity	/	0.253–0.765 $/m³ leachate	/	For blowers: 0.038–2.29 $/m³ leachate	7.65 $/m³ leachate	0.41 $/m³ leachate	/	(NH4)2SO4	/	/
		Liquid flow rate = 4167 L/h Time = 200 day/year Gas flow rate = 70 Nm³/h Temperature = 70 pH = 9 N.C. Removal efficiency = 90% 1 US$= 1 700 Lit. (Italian Lire)	0.0888–0.217 $/m³ leachate with 0.106 $/kWh for electricity	/	0.253–0.765 $/m³ leachate	/	For blowers: 0.038–2.29 $/m³ leachate	7.82 $/m³ leachate	0.41 $/m³ leachate	/	(NH4)2SO4	/	/
		Liquid flow rate = 4167 L/h Time = 200 day/year Gas flow rate = 45 Nm³/h Temperature = 70 pH = 11 Removal efficiency = 90% 1 US$= 1 700 Lit. (Italian Lire)	0.0888–0.217 $/m³ leachate with 0.106 $/kWh for electricity	/	0.253–0.765 $/m³ leachate	/	For blowers: 0.038–2.29 $/m³ leachate	10.41 $/m³ leachate	0.47 $/m³ leachate	/	(NH4)2SO4	/	/
		Liquid flow rate = 4167 L/h Time = 200 day/year Gas flow rate = 70 Nm³/h Temperature = 70 pH = 11 Removal efficiency = 90% 1 US$= 1 700 Lit. (Italian Lire)	0.0888–0.217 $/m³ leachate with 0.106 $/kWh for electricity	/	0.253–0.765 $/m³ leachate	/	For blowers: 0.038–2.29 $/m³ leachate	9.82 $/m³ leachate	0.47 $/m³ leachate	/	(NH4)2SO4	/	/
19	Nitrogen and Phosphorus Harvesting from Human Urine Using a Stripping, Absorption, and Precipitation Process	Liquid volume =1 m3 Initial TAN=4.5 kg of NH4-N	1.276$	/	9.28 $	/	/	11.02$		25.2 kg	NH4)2(SO4) + H(NH4)3(SO4)2 mixture (13% N)	8.468 $ ($534.76/ton of (NH4)2SO4 of 21% N)	2.61 $(Profit)
			1.276$	/	9.28 $	/	/	11.02$		/	CaCO3 + P	5.162$($1581.08/ton of phosphate, USDA 2013), ($156.6/ton of 36% Ca, Nordkalk)
20	Nutrients recovery from anaerobic digestate of agro-waste: Techno-economic assessment of full scale applications	Initial TAN=2600mg/L Liquid flow rate= 4250 L/h pH>9.5 Residence TAN=1800 mg/L	40 kW working 24 h per day (specific cost is 1.2296 $/m3	/	1.74 $/m3	/	0.348 $/m3	/	870000$ ( treating 100 m3/d gives a 1.8328 $/m3 ammortisation for 10 years)	/	(NH4)2SO4	/	/
21	Nitrogen removal from digester supernatant - comparison of chemical and biological methods	1 CFH = 1.10 USD Liquid flow rate= 150-300 L/h Removal efficiency=90% Removed TAN=60 tN/year (interest rate 6% for repayment period)	/	/	7.26 $/kg N	/	/	/	7.92 $/kg N	/	(NH4)2SO4	/	Repayment for investment is 15 y for mechanical equipment and 30y for concrete
22	High temperature ammonia stripping and recovery from process liquid wastes	Rashing rings Initial TAN=150 mg/L Liquid flow=50000L/h Gas flow rate=80 % G/Gl Temperature=varying pH=11 Working time= 8760 h/y	0,05 $/kWh	/	0.52 $/kg	/	0,015 $/kg	/	1073 $/m3	/	(NH4)2SO4	/	/
		Berl saddles Initial TAN=150 mg/L Liquid flow=50000L/h Gas flow rate=80 % G/Gl Temperature=varying pH=11 Working time= 8760 h/y	0,05 $/kWh	/	0.52 $/kg	/	/	/	444$/m3	/	(NH4)2SO4	/	/
		Berl saddles Initial TAN=150 mg/L Liquid flow=50000L/h Gas flow rate=80 % G/Gl Temperature=40 pH=11 Working time= 8760 h/y	0,05 $/kWh	/	0.52 $/kg	/	/	overall treatment 142361 $/y	320698 $	/	(NH4)2SO4	/	/
		Berl saddles Initial TAN=150 mg/L Liquid flow=50000L/h Gas flow rate=80 % G/Gl Temperature=80 pH=11 Working time= 8760 h/y	0,05 $/kWh	/	0.52 $/kg	/	/	overall treatment 89930 $/y	137558 $	/	(NH4)2SO4	/	/

## Sheet: Economic summary for VAS
No.	Study ID	Assumption	OPEX				CAPEX		Product			Profit
			Electric cost	Chemical cost (Alkaline and acid)	Maintenance	Others	Equipment and installation costs	Indirect cost	Amount	Type	Monetary value
1	Vacuum evaporation coupled with anaerobic digestion for process intensification and ammonia recovery: Model development, validation and scenario analysis	Cost include = energy consumption+energy recovery from biogas+sludge drying cost +chemical cost +nitrogen recovery revenue +avoided costs of nitrogen removal
2	Simultaneous ammonia recovery and treatment of sludge digestate using the vacuum stripping and absorption process: Scale-up design and pilot study	Full-scale Treatment capacity = 600 m3/d Hydraulic retention time = 5h Ammonia removal efficiency = 91%	0.31	1.19	/	/	/	/	/	(NH4)2SO4 Biosolids	521$/ton as fertilizer	$2.46/kg-N from (NH4)2SO4
3	Transforming wastewater ammonia to carbon free energy: Integrating fuel cell technology with ammonia stripping for direct power production	T = 65 ◦C Vacuum pressure =0.25 bar	0.84	/	/	/	/	/	/	/	/	/
4	Three-stage treatment for nitrogen and phosphorus recovery from human urine: Hydrolysis, precipitation and vacuum stripping	The cost to transfer urine with a water pump = 0	1.89694	0.253061	/	2.17449	/	/	46.3	(NH4)2SO4	23.15	/
5	Techno-economic assessment at full scale of a biogas refinery plant receiving nitrogen rich feedstock and producing renewable energy and biobased fertilisers	Captical cost include = NH3 stripping unit+ scrubbing unit+ filter press unit Operational costs = electricity use, FGD-gypsum consumption, insurance, maintenance and labour Treatment capacity = 68561 t digestate Depreciation 10 years at 3% interest rate	6.86 $/t digestate						3545 t (NH4)2SO4 Liming substrate Heat valorisation	(NH4)2SO4 solution Liming substrate Heat valorisation	/	8.28 $/t digestate
6	Stable, high-rate anaerobic digestion through vacuum stripping of digestate	Treatment capacity = 50.4 m3/d HRT = 21 d Initial TAN = 3000 mg/L Ammonia recovery efficiency = 97%	4.34483	3.47079	/	/	/	/	689 kg	(NH4)2SO4 crystals	2.45621	5.17926
									5692 kWh	Increased biogas energy production	2.7261
7	Preliminary design of optimized heat integrated two-stage vacuum evaporation for processing digestate from biogas plant	Two-stge vacuum evaporation Lifespan = 10 year Tax rate = 20% Discount rate = 10%	1.71469	0.81652	/	Depreciation =1.25 $/kg N/y	481201.23$	144360.37$	5293 t/y	Fertilizer	377181.37 $/year	IRR = 39.5 NPV = 947533.70$ Payback time = 2.4 year
									14907 m3/y	Water saving	17624.73 $/year
8	Empowering anaerobic digestion of dairy cow manure with pretreatment and post-treatment using vacuum stripping	VAS as pretreatment for liquid manure Dairy farm size = 1000 milking cows Liquid manure = 110 m3/d TAN concentration of liquid manure= 800 mg/L Ammonia removel efficiency = 34%	11.6058				/	/	142 kg	(NH4)2SO4	74	19.8905
									686.4 m3	Increased biogas energy production	329.5
									2453 kwh	Reduced heating for digestion	196.2
		VAS as post-treatment for liquid manure Dairy farm size = 1000 milking cows Liquid manure = 110 m3/d TAN concentration of digestate = 1600 mg/L Ammonia removel efficiency = 82.5%	3.57576				/	/	270 kg	(NH4)2SO4	140.5	5.40152
									/	Hualing cost saving	429
9	Efficient nutrient recovery/removal from real source-separated urine by coupling vacuum thermal stripping with activated sludge processes	Cost include = energy consumption for heating + vacuum + MCR	0.395144	0.116778	/	0.0162946	/	/	40.43 kg/m3	(NH4)2SO4 solids	4.66 $/ m3	0.0353049
									2.11 kg/m3	Struvite precipitates	0.25 $/ m3
10	Vacuum evaporation coupled with anaerobic digestion for process intensification and ammonia recovery: Model development, validation and scenario analysis	VAS as pretreatment for anaerobic digesters Initial TAN = 2726 mg/L Ammonia recovery efficiency = 0.04%	886.931	0.43	/	/	14000		16027kWh/d 2 $/d 2.33 kgN/d	Energy recovery Ammonia recovery revenue Nitrogen removal benefits	2138.00 $/d 2 $/d 12 $/d	-412.37
		VAS as post-treatment for anaerobic digesters at pH 9 Initial TAN = 1342 mg/L Ammonia recovery efficiency = 18.46%	4.86375	0.313943	/	/	25000		24881kWh/d 186 $/d 423.64 kgN/d	Energy recovery Ammonia recovery revenue Nitrogen removal benefits	3319.13 $/d 186 $/d 2186 $/d	5.78553
		VAS as post-treatment for anaerobic digesters at 100 ℃ Initial TAN = 1342 mg/L Ammonia recovery efficiency = 10.49%	8.62259	0.191111	/	/	25000		24881kWh/d 106 $/d 240.698 kgN/d	Energy recovery Ammonia recovery revenue Nitrogen removal benefits	3319.13 $/d 106 $/d 1242 $/d	6.22773
		VAS as intensification for anaerobic digesters at neutral pH Initial TAN = 1915 mg/L Ammonia recovery efficiency = 2.73%	12.1359	0.38244	/	/	14000		23615kWh/d 150 $/d 169.96 kgN/d	Energy recovery Ammonia recovery revenue Nitrogen removal benefits	3150.24 $/d 150 $/d 877 $/d	5.89546
		VAS as intensification for anaerobic digesters at pH 9 Initial TAN = 1005 mg/L Ammonia recovery efficiency = 13.12%	4.8181	0.502218	/	/	14000		23615kWh/d 277 $/d 428.10 kgN/d	Energy recovery Ammonia recovery revenue Nitrogen removal benefits	3150.24 $/d 277 $/d 2209 $/d	5.63185

## Sheet: Economic summary for MAS
No.	Study ID	Assumption	OPEX				CAPEX		Product			Profit
			Electric cost	Chemical cost (Alkaline and acid )	Maintenance costs	Others	Equipment costs	Membrane costs	Amount	Type	Monetary value
1	Ammonia capture from human urine to harvest liquid N-P compound fertilizer by a submerged hollow fiber membrane contactor: Performance and fertilizer analysis	/	0.072	0.311	/	/	/	/	1L	Liquid fertilizer product	$8.192/L	7.089
2	Ammonia harvesting via membrane gas extraction at moderately alkaline pH: A step toward net-profitable nitrogen recovery from domestic wastewater	Initial TAN = 35 mg/L Removal efficiency = 100% pH = 9.2	/	0.457143	/	/	/	/	/	(NH4)2SO4	0.02	cBCR = 1.2
		Initial TAN = 35 mg/L Removal efficiency = 100% pH = 11	/	/	/	/	/	/	/	(NH4)2SO4	/	cBCR (5-year average) = 0.34
3	Anaerobic digestion of chicken manure coupled with ammonia recovery by vacuum-assisted gas-permeable membrane process	Liquid digestate amount = 430 m3/d Lifespan = 20 years Operational time = 330 days/year Initial TAN = 4000 mg/L Membrane area = 1433 m2 Ammonia recovery efficiency = 80% Only chemical costs of alkaine isincluded	0	0.1925	0.153782		798203		/	(NH4)2SO4	$ 200/ton	0.51
4	Application of non-acid stripping solution in hydrophobic membrane process for high-purity ammonia recovery from high-strength ammonium wastewater	Stripping acid : H3PO4	/	3.53	/	/	/	/	1.69 g/L	(NH4)3PO4	0.8112	cBCR = 0.6
5		Stripping acid : H2NO3	/	2.96	/	/	/	/	1.64 g/L	(NH4)2NO3	0.7872	cBCR = 0.54
6		Stripping acid : H2SO4	/	2.72	/	/	/	/	1.68 g/L	(NH4)2SO4	0.8064	cBCR = 0.68
7		Stripping acid : DI water	/	0.58	/	/	/	/	0.8 g/L	NH3(aq)	0.384	cBCR = 1.42
8	Economic analysis of the scale-up and implantation of a hollow fibre membrane contactor plant for nitrogen recovery in a full-scale wastewater treatment plant	Fed wastewater flow (WWinf) = 40000m3/d Feed flow = 0.02 m3/s pH=9 Acid solution flow rate = 0.02 m3/s Efficiency of the pump and the motor = 75% Removal efficiency = 90% Membrane and pump lifespan = 10 year Settler lifespan = 20 year MCs working time = 20 hours per day Price of electricity = 0.1 $/kWh	0.0109272	0.58	/	/	0.0182816	1.972	400 kg/day	(NH4)2SO4 solution with a nitrogen content of 4%	0.0077	0.009
		Fed wastewater flow (WWinf) = 40000m3/d Feed flow = 0.117 m3/s pH=9 Acid solution flow rate = 0.03 m3/s Efficiency of the pump and the motor = 75% Removal efficiency = 90% Membrane and pump lifespan = 10 year Settler lifespan = 20 year MCs working time = 20 hours per day Price of electricity = 0.1 $/kWh	0.032074	0.58	/	/	0.0454256	/	0.01	(NH4)2SO4 solution with a nitrogen content of 4%	0.8932	0.8932
		Fed wastewater flow (WWinf) = 40000m3/d Feed flow = 0.117 m3/s pH=10 Acid solution flow rate = 0.03 m3/s Efficiency of the pump and the motor = 75% Removal efficiency = 90% Membrane and pump lifespan = 10 year Settler lifespan = 20 year MCs working time = 20 hours per day Price of electricity = 0.1 $/kWh	0.032074	0.6728	/	/	0.0454256	/	0.01	(NH4)2SO4 solution with a nitrogen content of 4%	0.8932	0.8932
		Fed wastewater flow (WWinf) = 40000m3/d Feed flow = 0.117 m3/s pH=11 Acid solution flow rate = 0.03 m3/s Efficiency of the pump and the motor = 75% Removal efficiency = 90% Membrane and pump lifespan = 10 year Settler lifespan = 20 year MCs working time = 20 hours per day Price of electricity = 0.1 $/kWh	0.032074	0.87	/	/	0.0454256	0.348	0.01	(NH4)2SO4 solution with a nitrogen content of 4%	0.8932	0.8932
9	Economic optimization of hollow fiber membrane contactors for ammonia nitrogen recovery from anaerobic digestion effluents	Initial TAN = 100 mg/L CaCO3 = 400mg/L Removal efficiency = 90% pH = 10.4 Lm = 2.06 m3/day Only costs for the operation of liquid pumps isincluded	0.0755556	0.555556	/	/	/	/	/	(NH4)2SO4	/	/
		Initial TAN = 300 mg/L CaCO3 = 1200mg/L Removal efficiency = 90% pH = 10.3 Lm = 2 m3/day Only costs for the operation of liquid pumps isincluded	0.0307407	0.566667	/	/	/	/	/	(NH4)2SO4	/	/
		Initial TAN = 700 mg/L CaCO3 = 2800mg/L Removal efficiency = 90% pH = 10.25 Lm = 1.84 m3/day Only costs for the operation of liquid pumps isincluded	0.0165079	0.536508	/	/	/	/	/	(NH4)2SO4	/	/
10	Pilot scale on-site demonstration and seasonality assessment of nitrogen recovery and water reclamation from pig's slurry liquid fraction	Annual wastewater amount (after microfiltration) = 2135.76 m3/year Membrane area = 50 m2 Membrane elements =1 Annual working days = 350 Lifetime of service = 20 years	0.00662183	/	/	/	6962	5801	48.38 ton/year	(NH4)2SO4	/	NPV > 0 (20th year) NPV < 0 (1st - 19th year)
		Annual wastewater amount (after microfiltration) = 1584 m3/year Membrane area = 50 m2 Annual working days = 350 Lifetime of service = 20 years	0.15	/	/	/	6962	5801	35.83 ton/year	(NH4)2SO4	/	NPV < 0 (1st - 20th year)
		Annual wastewater amount (after microfiltration) = 2640 m3/year Membrane area = 50 m2 Annual working days = 350 Lifetime of service = 20 years	0.15	/	/	/	6962	5801	35.83 ton/year	(NH4)2SO4	/	NPV > 0 (10th - 20th year) NPV < 0 (1st - 9th year)
11	Pilot scale study: First demonstration of hydrophobic membranes for the removal of ammonia molecules from rendering condensate wastewater	Removal efficiency = 70%	0.3	2.61	0	/	389882		/	(NH4)2SO4	1.79	/
12	Recovery of nitrogen and phosphorus from human urine using membrane and precipitation process	Investment and labor costs are not included in the calculation Initial TAN(pure urine) = 3900 mg/L Temperature = 20 °C pH=11.9 Time = 16h Recovery efficiency = 100%	1.24359	2.14103	/	/	/		(NH4)2(SO4)=23.3kg PO4-P =24 kg CaCO3 =0.35 kg	(NH4)2(SO4) (19% N) PO4-P CaCO3	15.07	1.74
13	Simultaneous recovery of fresh water and ammonia from produced water by membrane contactor coupled with membrane distillation	Electricity cost = 0.07 $/kwh (China) Initial TAN = 186.7 mg/L Ammonia phosphate recovery efficiency =16%	46.1538	10.0334	26.7559	0	/		8.97e-06	Ammonium phosphate	/	2.67559
14	Transmembrane Chemical Absorption Process for Recovering Ammonia as an Organic Fertilizer Using Citric Acid as the Trapping Solution	Reject water inflow = 600 m3/d pH = 10 Temperature = 40 ◦C.	21.93 ~ 28.66 $/d/kg N						70.5 ~ 195.7 kg/d	(NH4)2SO4 C6H17N3O7	0.5 ~ 1.23 €/d/kg N	-20.19 ~ -17.29 €/d/kg N
15	Ultrahigh-purity ammonia recovery from synthetic coke wastewater via membrane contactor: Overcoming phenolic interference and assessing cost efficiency	Recoverd NH3-N = 1 kg/ day Initial TAN = 500 mg/L Flow rate = 600 m3/day Annual volume = 219000 m3 Membrane area = 200 m2 Lifetime of service = 20 years Removal efficiency = 90% T = 42°C pH 11 Energy requirements for ammonia recovery processes (including wastewater heating, aeration, and solution circulation)	29.6667	4.57778	5.73333	2.37778	163796		/	/	/	/
		Initial TAN = 500 mg/L Flow rate = 600 m3/day Annual volume = 219000 m3 Membrane area = 200 m2 Lifetime of service = 20 years Removal efficiency = 90% pH 12 Energy requirements for ammonia recovery processes (including wastewater heating, aeration, and solution circulation)	29.6667	6.11111	5.8	2.37778	168166		/	/	/	/
16	Impact of Sidestream Pre-Treatment on Ammonia Recovery by Membrane Contactors: Experimental and Economic Evaluation	Initial TAN = 710 mg/L Flow rate = 150 m3/day Stripping solution = HNO3 Recovery efficiency = 64% Capital costs = membrane contactor, tanks, stirrers, blowers and pumps pH=10.2	383604	644589	13499.2	60746.6	23623.7		/	NH4NO3	962078	-162860
17	A Feasibility Study of Ammonia Recovery from Coking Wastewater by Coupled Operation of a Membrane Contactor and Membrane Distillation	/	/	10.933	/	/	/	/	/	/	/	/
18	Sustainable ammonia resource recovery from landfill leachate by solar-driven modified direct contact membrane distillation	Air stripping associated with an absorption tank Initial TAN = 2547 mg/L Flow rate = 20 m3/h Ammonia recovery efficiency = 52.7% pH=12 Lifespan = 15 years	19.25				229285		/	(NH4)2SO4 + Environmental Valuation	498376	9420.55
		Ultrafiltration associated with Membrane Distillation sourced by electrical energy Initial TAN = 2547 mg/L Flow rate = 20 m3/h Ammonia recovery efficiency = 52.7% pH=12 Lifespan = 15 years	13.22				235482		/	(NH4)2SO4 + Environmental Valuation	869309	272193
		Ultrafiltration associated with Membrane Distillation sourced by solar energy Initial TAN = 2547 mg/L Flow rate = 20 m3/h Ammonia recovery efficiency = 52.7% pH=12 Lifespan = 15 years	11.08				250741		/	(NH4)2SO4 + Environmental Valuation	869309	363300
19	Effects of anaerobic digestion centrate pre-treatment on further nutrient recovery by membrane contactors	Cost for full-scale plant includs chemical reagents, equipment, and energy pumping requirements. WWTP influent flowrate (WWinf) = 20664 m3/day Feed flow in MC = 135 m3/day Discount rate = 4 % Lifespan = 10 year Recovery efficiency = 87% (75 kgN/day = 0.56 kgN/m3)	0.0296679	0.403859	0.501637		0.0549482		75 kgN/day=0.56 kgN/m3	(NH4)2SO4	0.9	/
20	Enhancing recovery of ammonia from swine manure anaerobic digester effluent using gas-permeable membrane technology	With aeration Flow rate = 21.8m3/d = 35.1 kg N/d TKN = 2007 mg/L Lifespan = 10 year Recovery efficiency = 98% Requirement of H2SO4 = 3.5 kg/kg N recovered	0.0812943	1.26301	1.67841		21059 $/year ($141,310 initial investment)		12547 kg/year	(NH4)2SO4	2.71	/
		Without aeration Flow rate = 21.8m3/d = 35.1 kg N/d TKN = 2007 mg/L Lifespan = 10 year Recovery efficiency = 98% Requirement of H2SO4 = 3.5 kg/kg N recovered	10.1055				21059 $/year ($141,310 initial investment)
21	Techno-economic evaluation of ammonia recovery from biogas slurry by vacuum membrane distillation without pH adjustment	Using pH adjustment with NaOH hydraulic retention time (HRT) = 20 days Plant capacity = 320 m3/d Membrane area = 280 m2 TAN removal efficiency = 90% Lifespan = 20 years Operational time = 330 days/year Energy source: nature gas	1.967				559353	10080		NH4HCO3	142 $/t-dry matter	-2.058
		Using pH adjustment with NaOH hydraulic retention time (HRT) = 20 days Plant capacity = 320 m3/d Membrane area = 280 m2 TAN removal efficiency = 90% Lifespan = 20 years Operational time = 330 days/year Energy source: waste heat	1.952									-2.031
		Using pH adjustment with CaO hydraulic retention time (HRT) = 20 days Plant capacity = 320 m3/d Membrane area = 280 m2 TAN removal efficiency = 90% Lifespan = 20 years Operational time = 330 days/year Energy source: nature gas	0.854									-0.055
		Using pH adjustment with CaO hydraulic retention time (HRT) = 20 days Plant capacity = 320 m3/d Membrane area = 280 m2 TAN removal efficiency = 90% Lifespan = 20 years Operational time = 330 days/year Energy source: waste heat	0.84									-0.028
		Using pH adjustment waste alkali hydraulic retention time (HRT) = 20 days Plant capacity = 320 m3/d Membrane area = 280 m2 TAN removal efficiency = 90% Lifespan = 20 years Operational time = 330 days/year Energy source: nature gas	0.548									0.496
		Using pH adjustment waste alkali hydraulic retention time (HRT) = 20 days Plant capacity = 320 m3/d Membrane area = 280 m2 TAN removal efficiency = 90% Lifespan = 20 years Operational time = 330 days/year Energy source: waste heat	0.533									0.523
		Without pH adjustment hydraulic retention time (HRT) = 20 days Plant capacity = 320 m3/d Membrane area = 280 m2 TAN removal efficiency = 90% Lifespan = 20 years Operational time = 330 days/year Energy source: nature gas	0.602									0.4
		Without pH adjustment hydraulic retention time (HRT) = 20 days Plant capacity = 320 m3/d Membrane area = 280 m2 TAN removal efficiency = 90% Lifespan = 20 years Operational time = 330 days/year Energy source: waste heat	0.538									0.514

## Sheet: Economic summary for EAS
No.	Title	Assumption	EC type	OPEX and Maintenance				CAPEX		Product			Profit
				Electric cost	Chemical cost (Alkaline and acid )	Maintenance costs	Others	Other equipment costs	Membrane costs (include membrane replacement)	Amount	Type	Monetary value
1	Electrolyte-free electrochemical ammonia stripping integrated with flocculation for efficient nitrogen recovery from swine manure biogas slurry	Only energy consumption cost	IEMs	0.1- 0.06 $/kg N	/	/	/	/	/	/	/	/	/
2	Hybrid Donnan dialysis–electrodialysis for efficient ammonia recovery from anaerobic digester effluent	DD-EC process Treatment of kitchen waste with 1224 mg L 1 NH4þ (68 mM) and 5 m3 d 1 wastewater, excluding the labor cost and potential environmental and ecological benefits. Liquid digestate amount = 5 m3/d Lifespan = 20 years Interest rate = 5% Membrane replacement = 10%/year Feed NH4+ concentration = 840 mg/L NH4+ flux = 98 gN/m2/d Ammonium recovery efficiency = 80%	IEMs	3.8						1,226.4 kg N/year	Ammonium sulfate	$3323.5/year	$1358/year
3	Long-Term Robustness and Failure Mechanisms of Electrochemical Stripping for Wastewater Ammonia Recovery	Lab scale Lifespan = 20 years	IEMs	1.414	0.162	15.43	0	17.35		/	Ammonium sulfate(21g/L N)	2.18	/
4	Prototyping and modelling a photovoltaic-thermal electrochemical stripping system for distributed urine nitrogen recovery	Lab scale, controlled PV electricity, Palo Alto, summer	IEMs	/				530.48		/	Fertilizer and electrity sales	/	2.16 $/kg N
		Lab scale, controlled PV electricity, Palo Alto, winter								/	Fertilizer and electrity sales	/	1.14 $/kg N
		Lab scale, controlled PV electricity, Oklahoma City, summer								/	Fertilizer and electrity sales	/	2.18 $/kg N
		Lab scale, controlled PV electricity, Oklahoma City, winter								/	Fertilizer and electrity sales	/	1.54 $/kg N
		Lab scale, controlled PV electricity, Kampala, summer								/	Fertilizer and electrity sales	/	4.1 $/kg N
		Lab scale, controlled PV electricity, Kampala, winter								/	Fertilizer and electrity sales	/	4.13 $/kg N
5	Simultaneous nitrogen and phosphorus recovery from municipal wastewater by electrochemical pH modulation	Excluding CEM costs	IEMs	4.56 $/kg N						/	/	/	/
				3.4 $/kg N						/	/	/	/
6	Ammonia recovery in bipolar membrane electrodialysis via pH control through electric current pulse modulation	constant current model	ED	2.23 $/kg N	0.14 $/kg N	0.09 $/kg N	/	/	/	/	/	/	/
		pH control model		0.71 $/kg N	0 $/kg N	0.05 $/kg N	/	/	/	/	/	/	/
7	Pulsed electric field drives chemical-free membrane stripping for high ammonia recovery from urine	Chemical dose, the energy consumption for ammonia recovery and equipment construction were evaluated.	ED	4.8 $/kg N				11.1 $/kg N		/	/	/	/
8	Concurrent recovery of ammonia and phosphate by an electrochemical nutrients recovery system with authigenic acid and base		ED	1.46 $/kg N	0.37 $/kg N	/	/	/	/	0.000151 kg N	Ammonium sulfate	0.00019932	/
9	Concentrating Nitrogen Waste with Electrodialysis for Fertilizer Production	Lab scale	ED	0.9 $/kg N	0.88 $/kg N	/	/	/	/	/	/	/	/
10	The impact of absorbents on ammonia recovery in a capacitive membrane stripping system	Absorption acid = H2SO4	ED	/	0.926 $/kg N	/	1.184 $/kg N	/		/	Ammonium sulfate	0.61 $/kg N	1.4 $/kg N
		Absorption acid = H3PO4		/	6.49 $/kg N	/	1.27 $/kg N			/	Ammonium sulfate	5.22 $/kg N	2.4 $/kg N
		Absorption acid = HNO3		/	2.42 $/kg N	/	1.44 $/kg N			/	Ammonium sulfate	1.01 $/kg N	2.5 $/kg N
		Absorption acid = HCl		/	0.67 $/kg N	/	1.57 $/kg N			/	Ammonium sulfate	0.44 $/kg N	1.6 $/kg N
		Absorption acid = H2CO3		/	-0.26 $/kg N	/	1.84 $/kg N			/	Ammonium sulfate	1.1 $/kg N	0.3 $/kg N
		Absorption acid = H2O		/	0	/	2.63 $/kg N			/	Ammonium sulfate	4.96 $/kg N	-2.5 $/kg N
11	Simple and Low-Cost Electroactive Membranes for Ammonia Recovery	Lifespan = 30 years Interest rate = 6.33% Labor & maintenance included	Other	15.29 $/kg N	1.21 $/kg N	1.13 $/kg N	1.15 $/kg N	14.72 $/kg N		/	/	/	/

## Sheet: Economic summary for NS
No.	Study ID	Assumption	OPEX				CAPEX		Product			Profit
			Electric cost	Chemical cost (Alkaline and/or acid )	Maintenance costs	Other			Amount	Type	Monetary value
1	Removal of ammonia nitrogen in wastewater by microwave radiation: A pilot-scale study	/	2.88 $/m3 WW				/		/	/	/	/
2	Improved mesophilic anaerobic digestion of swine wastewater by ammonia stripping with microwave irradiation	Time = 5.5min Treatment capicity = 0.2 L wastewater	24.4 $/m3 WW				/		9.94 kWh/m3 WW	Methane calorific value	0.53 kWh/m3 WW	$2.4/m3 SWW
3	Repeatedly using the decomposition product of struvite by ultrasound stripping to remove ammonia nitrogen from landfill leachate	Costs for energy consumption of ultrasound stripping, the preformed struvite, and the used NaOH were taken into account. Initial TAN = 1395 mg/L Ammonia recoval efficienct = 90%	2.76 $/kgN				/		/	/	/	/
4	Efficient treatment of aged landfill leachate containing high ammonia nitrogen concentration using dynamic wave stripping: Insights into influencing factors and kinetic mechanism	The cost comprises the electricity charge generated by the centrifugal pump and fan and the adding NaOH	1.855572998 $/kg N	4.424427002 $/kg N	/	/	/	/	/	/	/	/
			3.954474097 $/kg N	3.805525903 $/kg N	/	/	/	/	/	/	/	/
			4.709576138 $/kg N	4.050423862 $/kg N	/	/	/	/	/	/	/	/
			3.894819466 $/kg N	4.115180534 $/kg N	/	/	/	/	/	/	/	/
			4.009419152 $/kg N	3.470580848 $/kg N	/	/	/	/	/	/	/	/
5	Ammonium removal and recovery from greywater using the combination of ion exchange and air stripping: The utilization of NaOH for the regeneration of natural zeolites	Treatment capicity = 100 m3/d Initial TAN = 50 mg/L Ammonia desorption efficienct = 95%	/	19005 $/year	/	/	/	/	/	/	/	/
